# Supplementary material
Source: publisher figshare collection journal article supplement (https://acs.figshare.com/ndownloader/files/16266656)
Supplement: Supplementary file 1 [file 16266656]

## Sheet: README
Supporting Information for the article:
Title	Taking stock of built environment stock studies: Progress and prospects
Authors	Maud Lanau, Gang Liu, Ulrich Kral, Dominik Wiedenhofer, Elisabeth Keijzer, Chang Yu, Christina Ehlert
Journal	Environmental Science and Technology
Year	2019
Language acronyms used in the article database
CHN	Chinese
DE	German
EN	English
FR	French
JPN	Japanese

## Sheet: Article database
Author(s)	Year	Title	Published in	Type of Publication	Language	Data retrieving: facilitator	Material(s)	Unit(s)			End-use sector (as described)	End-use (Review Terminology)	Type of stock	Spatial scale(s)			Location	Spatial Data collection		Spatial resolution	Comment	Static/Dynamic	Reference year	Time scale	Approach
																		GIS	Remote sensing						Bottom-up	Top-down	Hybrid	Remote Sensing	Other
Aksözen, Mehmet; Hassler, Uta; Kohler, Niklaus	2016	Reconstitution of the dynamics of an urban building stock	Building Research & Information	Journal	EN	Lanau, M.	Number of NRB	#			Non-Residential Buildings	Non-Residential Buildings	in-use, demolished	Urban			Zurich, Switzerland			Urban		Dynamic	2010	1840-2010					X
Aksözen, Mehmet; Hassler, Uta; Rivallain, Mathieu & Kohler, Niklaus	2016	Mortality analysis of an urban building stock	Building Research & Information	Journal	EN	Lanau, M.	Number of buildings	#			Buildings (Residential Buildings; Non-Residential Buildings)	Residential Buildings + Non-Residential Buildings	in-use	Urban			Zurich, Switzerland	X		Urban		Dynamic	2010	1840-2010	X
Arendt, M.	2000	Kreislaufwirtschaft im Baubereich: Steuerung zukünftiger Stoffströme am Beispiel von Gips.	PhD Thesis	PhD thesis	DE	Kral, U.	gypsum, sulphur	mass			construction sector	Built environment		Regional			Upper Austria, Austria			Regional		Static	no exact ref year, data from 1990-1995		X
Augiseau, V.	2017	La dimension matérielle de l'urbanisation - Flux et stocks de matériaux de construction en Ile-de-France	PhD thesis	PhD thesis	FR	Lanau, M.	construction material	mass	mass/cap	mass/m2	buildings, transportation network, energy and water networks	buildings + transportation + energy + water networks		Urban			Ile de France, Paris (France)	X		Object scale (mapped)		Static	2013		X
Baccini, P	1996	Understanding regional metabolism for a sustainable development of urban systems.	Environmental Science and Pollution Research.	Journal	EN	Kral, U.	construction materials	mass			buildings	Buildings		Regional			A Swiss lowland region			Regional		Static	no rev. Year given		X
Bader, H.P., Scheidegger, R., Wittmer, D., Lichtensteiger, T.	2011	Copper flows in buildings, infrastructure and mobiles: a dynamic model and its application to Switzerland	Clean Technologies and Environmental Policy	Journal	EN	Lanau, M.	Copper	mass/cap			Infrastructures, buildings and mobiles	Buildings + Infrastructures	in-use, landfill	National			Switzerland			National		Dynamic	2000	1850-2060	X
Beers, D Van; Berkel, R Van; Graedel, TE	1987	the Application of Material Flow Analysis for the Evaluation of the Recovery Potential of Secondary Metals in Australia	Conference.Alcas.Asn.Au	Conference	EN	Lanau, M.	Copper, Zinc	mass			Building & Construction, Infrastructure, Transportation, Consumer Durables, Business Durables, Industrial Durables	Buildings + Infrastructures	in-use	National			Australia	X		Object scale (mapped)		Static	1985?		X
Beers, D. Van & Graedel, T. E.	2004	The Magnitude and Spatial Distribution of In-use Zinc Stocks in Cape Town, South Africa	African Journal of Environmental Assessment and Management	Journal	EN	Lanau, M.	Zinc	mass/m2	mass/cap		Building and construction, Transportation, Public infrastructures	Buildings + Infrastructures	In-use	Urban			Cape-Town, South Africa	X		Urban subareas		Dynamic	2000	2000, 2010, 2020, 2030	X
Belle, Iris; Wang, Tao & Hassler, Uta	2015	Age of land as parameter for sustainable transformation of Singapore's building stock	Habitat International	Journal	EN	Lanau, M.	Number of buildings	#			Building stock	Buildings	in-use	National			Singapore	X		Object scale (mapped)		Static	2012						X
Bellstedt, Carolin	2015	Material flow analysis for a circular economy development	MSc thesis	MSc thesis	EN	Lanau, M.	PVC	mass			Buildings, roads	Buildings + roads	in-use	Neighborhood			Amsterdam Neighborhood, Netherlands			Neighborhood		Static	2012		X
Bergbäck, B.; Johansson, K.; Mohlander, U,	2001	Urban metal flows–A case study of Stockholm. Review and conclusions.	Water, Air, & Soil Pollution	Journal	EN	Lanau, M.	Cd, Cr, Cu, Hg, Ni, Pb, Zn	mass			anthropogenic stock	Anthropogenic	in-use	Urban			Stockholm, Sweden			Urban		Static	1995						X
Bergmann, T., Bleher, D. and Jenseit, W.	2015	Ressourceneffizienzpotenziale im Tiefbau. Materialaufwendungen und technische Lösungen im Tiefbau	Report	Report	DE	Kral, U.	asphalt, concrete, unbound materials (sand, graval, natural stones, recylcing material, slags from steel production, bottom-ash from solid waste incineration, fly-ash from coal combustion, etc.), aluminum, steel, woodl, cooper , ceramics, bronce, geotextiles,	mass			civil engineering sector (traffic instracturce, energy infrastructure for electricity, gas, heat; water management, information- and telecommunication infrastructure)	Infrastructure		National			Germany			National		Static	No reference year given (about 2012)	Need for removal until 2030	X
Bergsdal, Håvard; Brattebø, Helge & Müller Daniel B.	2014	Dynamic material flow analysis for PCBs in the Norwegian building stock	Building Research & Information	Journal	EN	Lanau, M.	PCBs	mass			Buildings (Residential Buildings; Non-Residential Buildings)	Residential Buildings + Non-Residential Buildings	in-use	National			Norway			National		Dynamic	2010	1950-2100		X
Bergsdal, Håvard; Brattebø, Helge; Bohne, Rolf A. & Müller Daniel B.	2007	Dynamic material flow analysis for Norway's Dwelling stock	Building Research & Information	Journal	EN	Lanau, M.	Floor area, Concrete, wood	mass	floor area		Residential Buildings	Residential Buildings	in-use	National			Norway			National		Dynamic	2003	1900-2100		X
Blomberg, Jerry; Söderholm, Patrik	2009	The economics of secondary aluminium supply: An econometric analysis based on European data	Resources, Conservation & Recycling	Journal	EN	Lanau, M.	Aluminum	mass			Not differentiated: Transport, Mechanical engineering, Electrical Engineering, Building and Construction, Chemical engineering, packaging, household and office, powder iron and steel and others	Anthropogenic	Scrap	National			France, Italy, Germany, UK			National		Dynamic	1997	1982-1997		X
Bradley, Patrick Erik & Kohler, Niklaus	2007	Methodology for the survival analysis of urban building stocks	Building Research & Information	Journal	EN	Lanau, M.	Number of buildings	#			Buildings (Residential Buildings; Non-Residential Buildings)	Residential Buildings + Non-Residential Buildings	in-use	Urban			Ettlingen, Germany			Urban		Dynamic	2000	1936-2000; 2100	X
Brattebø, Helge; Bergsdal, Håvard; Sandberg, Nina Holck; Hammervold, Johanne & Müller Daniel B.	2009	Exploring built environment stock metabolism and sustainability by systems analysis approaches	Building Research & Information	Journal	EN	Lanau, M.	Concrete, Wood, Floor area, PCBs	mass			Building, road bridge	Buildings + RoadBridge	in-use	National			Norway			National		Dynamic	2007	1900-2100		X
Brown, Rickaby, Bruhns and Steadman	2000	Surveys of nondomestic buildings in four English towns	Environment and Planning B: Urban Analytics and City Science	Journal	EN	Lanau, M.	floor area	floor area			Non-Residential Buildings	Non-Residential Buildings	in-use	Urban			Swindon, Manchester, Tamworth, Bury St Edmunds, UK			Urban		Static	1992						X
Bruhns; Steadman; Herring; Moss and Rickaby	2000	Types, numbers, and floor areas of nondomestic premises in England and Wales, classified by activity	Environment and Planning B: Urban Analytics and City Science	Journal	EN	Lanau, M.	number of buildings, floor area	floor area	#		Non-Residential Buildings	Non-Residential Buildings	in-use	National			England and Wales			National		Static	1994						X
Buchert, M.; Fritsche, U.; Jenseit, W.; Rausch, L.; Deilmann, C.; Schiller, G.; Siedentop, S.; Lipkow, A.	2004	Nachhaltiges Bauen und Wohnen in Deutschland. Stoffflussbezogene Bausteine für ein nationales Konzept der nachhaltigen Entwicklung – Verknüpfung des Bereiches Bauen und Wohnen mit dem komplementären Bereich „Öffentliche Infrastruktur“; 2004. (Material-flow related elements for a national concept of Sustainable Development – linking the construction and housing sector with the corresponding infras…	Report	Report	DE	Kral, U.	Clay, merl, gravel, sand, recycled concrete, mineral resources, wood products, insulation material, window material	mass			Residential buildings, infrastructure for residential buildings	Residential Buildings + Infrastructures	in-use	National			Germany			National		Dynamic	2000	2000-2025	X
Buchner, Hanno; Laner, David; Rechberger, Helmut; Fellner, Johann	2015	Dynamic Material Flow Modeling: An Effort to Calibrate and Validate Aluminum Stocks and Flows in Austria	Environmental Science and Technology	Journal	EN	Lanau, M.	Aluminum	mass			Transport, Infrastructure, Mechanical Engineering, Electrical Engineering, Consumer, Packaging	Built environment	in-use	National			Austria			National		Dynamic	2012	1964-2012			X
Cao, Zhi; Shen, Lei; Liu, Litao; Zhao, Jianan; Zhong, Shuai; Kong, Hanxiao	2017	Estimating the in-use cement stock in China: 1920–2013	Resources, Conservation & Recycling	Journal	EN	Lanau, M.	cement	mass			buildings, infrastructure facilities and agriculture facilities	Buildings + Infrastructures	in-use	National			China			National		Dynamic	2013	1920-2013		X
Cao, Zhi; Shen, Lei; Løvik, Amund N.; Müller, Daniel B.; Liu, Gang	2017	Elaborating the History of Our Cementing Societies: An in-Use Stock Perspective	Environmental Science and Technology	Journal	EN	Lanau, M.	cement	mass/cap			non-mobile stock	Buildings + Infrastructures	in-use	Global			Global			multinational		Dynamic	2014	1931-2014		X
Cao, Zhi; Shen, Lei; Zhong, Shuai; Liu, Litao; Kong, Hanxiao; Sun, Yanzhi	2017	A probabilistic dynamic material flow analysis model for chinese urban housing	Journal of Industrial Ecology	Journal	EN	Lanau, M.	floor area	m2			Residential Buildings	Residential Buildings	in-use	National			China			National		Dynamic	2015	1950-2100		X
Chen, Chang; Shi, Feng; Okuoka, Keijiro & Tanikawa, Hiroki	2016	The Metabolism Analysis of Urban Building by 4d-GIS - A Useful Method for New-type Urbanization Planning in China	Universal Journal of Materials Science	Journal	EN	Lanau, M.	Cement, Wood, Steel, Brick	mass			Buildings (Residential Buildings, High-rise (>10 floors), Multi-story building and bungalow (<10 floors))	Buildings	in-use	Urban			Ezhou City, China	X		Object scale (mapped)		Dynamic	2013	1970-2013	X
Chen, Wei Qiang; Graedel, T. E.	2012	Dynamic analysis of aluminum stocks and flows in the United States: 1900-2009	Ecological Economics	Journal	EN	Lanau, M.	aluminum	mass	mass/cap		Transportation, Building & Construction, Machinery & Equipment, Consumer Durables, Electrical Engineering; Containers & Packaging; Others; Total	Built environment	in-use; ore; tailing ponds; slag repositories and landfills; obsolete-hibernating stocks and EoL exports; Non-metallic use: Total (=total domestic stock)	National			USA			National		Dynamic	2009	1900-2009		X
Chen, Wei Qiang; Shi, Lei	2012	Analysis of aluminum stocks and flows in mainland China from 1950 to 2009: Exploring the dynamics driving the rapid increase in China's aluminum production	Resources, Conservation & Recycling	Journal	EN	Lanau, M.	aluminum	mass	mass/cap		Transportation, Building & Construction, Machinery & Equipment, Consumer Durables, Electrical Engineering, Containers & Packaging, Others, Total	Built environment	in-use, dissipated loss stock, deposited loss stock, ore stock	National			China			National		Dynamic	2009	1950-2009		X
Cheng, Kuang Ly; Hsu, Shu Chien; Li, Wing Man; Ma, Hwong Wen	2018	Quantifying potential anthropogenic resources of buildings through hot spot analysis	Resources, Conservation & Recycling	Journal	EN	Lanau, M.	construction material	mass	mass/cap	mass/km2	Buildings	Residential Buildings+ commercial + industrial + governmental + institutional	in-use	Urban			Taipei City	X		Object scale (mapped)		Dynamic	2014	1965-2014	X
Christian, Lauk; Helmut, Haberl; Karl-Heinz, Erb; Simone, Gingrich; Fridolin, Krausmann	2012	Global socioeconomic carbon stocks in long-lived products 1900–2008	Environmental Research Letters	Journal	EN	Lanau, M.	Socioeconomic C stock	mass	mass/cap		Cereals, Humans, Livestock, Bitumen, Plastic, Wooden Products	Anthropogenic	in-use	Global			Global			Global		Dynamic	2006	1900-2008		X
Ciacci, L.; Passarini, F.; Vassura, I.	2017	The European PVC cycle: In-use stock and flows	Resources, Conservation & Recycling	Journal	EN	Lanau, M.	PVC	mass	mass/cap		Medical, packaging, electrical engineering, transportation, home and leisure, building and construction	Built environment	in-use	National			EU			National		Dynamic	2012	1960-2012		X
Ciacci, Luca; Chen, Weiqiang; Passarini, Fabrizio; Eckelman, Matthew; Vassura, Ivano; Morselli, Luciano	2013	Historical evolution of anthropogenic aluminum stocks and flows in Italy	Resources, Conservation & Recycling	Journal	EN	Lanau, M.	aluminum	mass	mass/cap		building and construction, transportationm consumer durables, machinery and equipment, electrical engineering, containers and packaging, miscellaneous appliance	Built environment	in-use	National			Italy			National		Dynamic	2009	1947-2009		X
Ciacci, Luca; Vassura, Ivano; Passarini, Fabrizio	2017	Urban Mines of Copper: Size and Potential for Recycling in the EU	Resources	Journal	EN	Lanau, M.	copper	mass	mass/cap		Building and construction, electrical and electronic products, industrial machinery and equipment, transportation equipment, consumer and general goods	Anthropogenic	in-use	Multinational			EU 28			Multinational		Dynamic	2014	1960 - 2014		X
Condeixa, Karina; Haddad, Assed; Boer, Dieter	2017	Material flow analysis of the residential building stock at the city of Rio de Janeiro	Journal of Cleaner Production	Journal	EN	Lanau, M.	Construction material	mass	mass/km2	#	Residential Buildings	Residential Buildings	in-use	Urban			Rio de Janeiro, Brazil			Urban		Static	2010		X
Daigo, I.; Igarashi, Y.; Matsuno, Y. & Adachi, Y.	2007	Accounting for steel stock in Japan	ISIJ International	Journal	EN	Lanau, M.	Steel	mass			Infrastructure, Buildings, Passenger vehicles, Trucks, Machines, Containers, Other products	Anthropogenic	in-use + hibernating	National			Japan			National		Dynamic	2000	1980-2000		X
Daigo, Ichiro; Hashimoto, Susumu; Matsuno, Yasunari; Adachi, Yoshihiro	2009	Material stocks and flows accounting for copper and copper-based alloys in Japan	Resources, Conservation & Recycling	Journal	EN	Lanau, M.	Copper, copper-based alloys	mass			Communication lines and power cables, Electric and electronic machinery, Automobiles, Other machinery, Construction, Other Products	Cables + Built environment	In-use	National			Japan			National		Dynamic	2005	1950-2005		X
Dall’O’, G., Galante, A., & Torri, M.	2012	A methodology for the energy performance classification of residential building stock on an urban scale	Energy and Buildings	Journal	EN	Lanau, M.	Number of	#			Residential Buildings	Residential Buildings	in-use	Urban			Carugate, Lombardy, Italy	X		Object scale (mapped)		Dynamic	2010	1919-2010	X
Daxbeck, et. al	2006	Beitrag der Abfallwirtschaft zum Kupferhaushalt Österreich	Report	Report	DE	Kral, U.	Copper	mass			Buildings, networks, consumer goods, landfills	Buildings + Infrastructures		National			Austria			National		Static	2003		X
Daxbeck, H., Schönbauer, A. and Brunner, P.H.	1998	Machbarkeitsstudie Nationale Stoffbuchhaltung: Testbeispiel Zink.	Report	Report	DE	Kral, U.	zinc	mass			Infrastructure, Buildings, Landfills	Buildings + Infrastructures	in-use	National			Austria			National		Static	1994		X
Daxbeck, Hans; Buschmann, Heinz; Neumayer, Stefan; Brandt, Bernd	2009	Methodology for mapping of physical stocks	Report (SIXTH FRAMEWORK PROGRAMME PRIORITY)	Report	EN	Lanau, M.	Construction material	mass			Residential Buildings, Non-Residential Buildings, Infrastructures + all othe parts of anthropo stock	Residential Buildings + Non-Residential Buildings + roads + water + wastewater + harbor + power supply + telecommunication + District Heating System + power plants + gas supply	in-use	National			Austria			National		Static	2003		X
Daxbeck, Hans; et.al	2003	Güterhaushalt Österreich (Projekt ABASG II)	Report	Report	DE	Kral, U.	Mineral materials (sand & gravel, natural stones, iron), biomass (food, wood, paper), energy carriers (oil, coal)	mass			buildings, networks (and many other stocks in the Antroposphere, depending on the type of material)	Buildings + Infrastructures		National			Austria			National		Static	2001		X
Daxbeck, Hans; et.al	1996	Der anthropogene Stoffhaushalt der Stadt Wien - N, C und Pb (Projekt PILOT)	Report	Report	DE	Kral, U.	Building materials, carbon, lead	mass			building construction and civil engineering, landfills	Buildings + Infrastructures	in-use	Urban			Vienna, Austria			Urban		Static	1991		X
Deilmann	2014	Sensitivitätsstudie zum Kreislaufwirtschaftspotenzial im Hochbau	Report	Report	DE	Kral, U.	concrete, bricks, calcareous sandstone, aerated concrete, other mineral materials, gypsum boards, other gypsum products, timber, other wood products, glas, mineral based insulation material, plastic based insulation material, plastic windows and doors, other plastics, metals, other materials	mass			buildings	Buildings		National			Germany			National		Dynamic	2010	2010, 2030, 2050		X
Deilmann, C., Gruhler, K.	2005	Stoff- und Energieflüsse von Gebäuden und Infrastrukturen als Grundlage für ein vorausschauendes szenariogeleitetes Stoffstrommanagement.	Österreichische Wasser- und Abfallwirtschaft.	Journal	DE	Kral, U.	construction materials	mass			buildings, infrastructure	Buildings + Infrastructures		Urban			-			Object scale (mapped)	Estimation of material content based on the settlement structure	Static	-		X
Deilmann, Clemens; Effenberger, Karl Heinz; Banse, Juliane	2009	Housing stock shrinkage: Vacancy and demolition trends in Germany	Building Research & Information	Journal	EN	Lanau, M.	number of dwellings	#			Residential Buildings	Residential Buildings	in-use	National			Germany			Regional		Dynamic	2006	2001-2050					X
Döberl, Gernot et. Al	2006	Verknüpfung Rohstofflager - anthropogene Lager - letzte Senken [Linking raw material stocks, anthropogenic stocks and final sinks]	Report	Report	DE	Kral, U.	Iron, Copper, Zinc, Aluminium	mass	mass/cap		cars, buildings (private households, industry, train stations etc.) power plants, networks (railroad, water, distance heating, electricity, telephone, streets, bridges, tunnels), machines	Residential Buildings+ Non-Residential Buildings+ Power plants + railroads + water + wastewater + District Heating System + electricity distrib + telecommunication + roads	in-use	National			Austria			National		Static	2003		X
Donovan, S.; Pickin, J.	2016	An Australian stocks and flows model for asbestos	Waste Management & Research	Journal	EN	Lanau, M.	Asbestos	mass			Cement sheeting residential, cement sheeting commercial, flooring products, friction products (in motor vehicles), roofing, other	Residential Buildings + Non-Residential Buildings + pipes	in-use	National			Australia			National		Dynamic	2003	1920-2100		X
Drakonakis, K.; Rostkowski, K.; Rauch, J.; Graedel, T. E.; Gordon, R. B.	2007	Metal capital sustaining a North American city: Iron and copper in New Haven, CT	Resources, Conservation & Recycling	Journal	EN	Lanau, M.	copper, iron	mass/cap			Building and construction; Scrap yards; Infrastructure (Water supply, Gas distribution, Sewerage, Streetscape, Rail lines, Bridges, Electricity transmission, Telecommunication); Transportation systems (Motor vehicles, Aircraft, Ships and boats, Railroad); Industrial machinery and equipment; Domestic and commercial equipment and appliances	Residential Buildings + Institutional + commercial + industrial + telecommunication + electricity + Water + Gas + railways	in-use	Urban			New Haven, USA			Urban		Static	2006?		X
Eckelman, M.; Rauch, J.; Gordon, R. B.,	2007	In-Use Stocks of Iron in the State of Connecticut, USA.	Working Paper Number 11, School of Forestry and Environmental Studies; Yale University: New Haven,	Working Paper	EN	Lanau, M.	Iron	mass	mass/cap		transportation, buildings, equipment, infrastructure	Residential Buildings + Commercial + Industrial + Water pipes + Nat gas pipes + Oil pipes + Sewers + Rails + Roads + electricity transmission and distrib + telecommunication	in-use	Regional			Connecticut, USA			Regional		Static	2000		X
Elshkaki, A.; Van der Voet, E.; Van Holderbeke, M.; Timmermans, V.	2004	The environmental and economic consequences of the developments of lead stocks in the Dutch economic system.	Resources, Conservation & Recycling	Journal	EN	Lanau, M.	Pb	mass			lead sheet in building, cable sheathing (indoor: buildings, outdoor: electricity cables, telephone cables, gas pipes)	Anthropogenic	in-use	National			Netherlands			National		Dynamic	2000	1989-2025		X
Elshkaki, Ayman; Graedel, T E	2013	Dynamic analysis of the global metals flows and stocks in electricity generation technologies	Journal of Cleaner Production	Journal	EN	Lanau, M.	Metals (Al, Cu, Fe, Ag, Ge, Te, In, Nd, Dy)	mass			Electricity Generation technologies	Electricity Generation technologies	in-use	Global	Multi-national		Middle East, Eastern Europe, South Asia, Pacific OECD, Southeast Asia, Africa, China, FSU, Western Europe, Latin America, North America			Multinational		Dynamic	2010	2010-2050		X
Ergun, Deniz	2014	The Potential Environmental Benefits of Reusable and Recyclable Materials Stocks in Toronto's Single-Detached Housing	MSc thesis	MSc thesis	EN	Lanau, M.	Insulation Plaster, Gypsum lath, Drywall, Asphalt shingles, Wood, Steel, Concrete, Aggregate, Brick, Rubblestone, Cinder Block, Clay Brick…	volume			Single Detached Housing	Single detached house	in-use, obsolete	Urban			Toronto, Canada			Urban		Static	2014		X
Ergun, Deniz & Gorgolewski, Mark	2015	Inventorying Toronto's single detached housing stocks to examine the availability of clay brick for urban mining	Waste Management	Journal	EN	Lanau, M.	Clay	volume	volume/year		Single Detached Housing	Single detached house	in-use, obsolete	Urban			Toronto, Canada			Urban		Static	2014		X
European Aluminum Association	2006	Aluminium Recycling in Europe: The Road to High Quality Products	Report (European Aluminium Association)	Report	EN	Lanau, M.	aluminum	mass			Buildings, Engineering and Cable, Transport and Automotive, Packaging, Other	Buildings	in-use	Global	Multi-regional		Global, EU 25			Multinational		Static	2004						X
Faist Emmenegger, Mireille; Frischknecht, Rolf; Cornaglia, Laurent & Rubli, Stefan	2003	Métabolisme des activités économiques du canton de Genève - Phase 1	Report (ESU - Environmental consultancy for business and authorities)	Report	FR	Lanau, M.	Gravel&Sand, Asphalt concrete, Concrete, Bricks, plastic, wood, iron, copper, aluminum	mass/cap			Residential Buildings, Non-Residential Buildings, Underground construction (roads, railways, gas network, water network, Elec network)	Residential Buildings + Non-Residential Buildings+ roads + railways + gas network + water network + wastewater + electricity network	in-use	Urban			Geneva, Switzerland			Urban		Static	2000		X
Fehringer, R., Brunner, P.H. and Baumann, H.	1997	Kunststoffflüsse und Möglichkeiten der Kunstoffverwendung in Österreich	Report	Report	DE	Kral, U.	plastics (including zinc, lead, cadmium)	mass			All stocks including building and infrastructure	Anthropogenic	in-use	National			Austria			National		static	1994		X
Fishman, Tomer; Schandl, Heinz & Tanikawa, Hiroki	2015	The socio-economic drivers of material stock accumulation in Japan's prefectures	Ecological Economics	Journal	EN	Lanau, M.	cement, aggregate, asphalt, timber, iron, glass, copper, and aluminum	mass			buildings, transport infrastructure	Built environment	in-use	Regional			9 Japan's prefectures (Tokyo - Nagoya - Osaka urban strip)	X		Regional		Dynamic	2010	1965-2010	X
Fishman, Tomer; Schandl, Heinz; Tanikawa, Hiroki	2016	Stochastic Analysis and Forecasts of the Patterns of Speed, Acceleration, and Levels of Material Stock Accumulation in Society	Environmental Science and Technology	Journal	EN	Lanau, M.	construction minerals (cement, gravel, aggregate, sand, bitumen)	mass	mass/year	mass/year^2	Built environment	Built environment	in-use	National			USA, Japan			National		Dynamic	2010	1970-2010;2010-2030					X
Fishman, Tomer; Schandl, Heinz; Tanikawa, Hiroki; Walker, Paul & Krausmann, Fridolin	2014	Accounting for the Material Stock of Nations	Journal of Industrial Ecology	Journal	EN	Lanau, M.	Timber, iron, other metals, non-metallic minerals	mass			Buildings and civil infrastructures	Built environment	anthropogenic stock	National			Japan, USA			National		Dynamic	2005	1930-2005-2050		X
Fraanje, P. J.	1999	Use of wood in new Dutch one family dwellings since 1969	Holz als Roh- und Werkstoff	Journal	EN	Kral, U.	wood	volume	mass		one family dwellings	Single family house	in-use	National			Netherlands			National		Dynamic	1996	1969-1996	X
Gallardo, C.; Sandberg, N. H. & Brattebo, H.	2014	Dynamic-MFA examination of Chilean housing stock: long- term changes and earthquake damage	Building Research & Information	Journal	EN	Lanau, M.	floor area	floor area			Dwelling stock	Residential Buildings	in-use	National			Chile			National		Dynamic	2010	1950-2100		X
Gamsjäger, Marlies	2015	Ressourcenpotential städtischer Verkehrsinfrastruktur am Beispiel der Wiener U-Bahn	MSc thesis	MSc thesis	DE	Kral, U.	concrete, steel and iron, copper, aluminium	mass			Subway line 1 (stammstrecke)	Subway	in-use + hibernating	Urban			Vienna, Austria			Urban		Static	2015		X
Gauch, M., C. Mastraci, I. Hincapie, R. Hörler and H. Böni	2016	Material- und Energieressourcen der baulichen Infrastruktur der Schweiz	Report	Report	DE	Kral, U.	Sand & gravel, asphalt, concrete, bricks, burnable materials, wood, metals, cermics & gypsum & glass & etc.	mass			Buildings, Infrastructure (incl. Streets, railroads, supply and disposal networks)	Buildings + Roads + railway + supply&disposal	in-use	National			Switzerland			National		Static	2015		X
Gerst, Michael D.	2009	Linking material flow analysis and resource policy via future scenarios of in-use stock: An example for copper	Environmental Science and Technology	Journal	EN	Lanau, M.	Copper	mass			Buildings (Residential Buildings, Non-Residential Buildings) (wiring, piping, HVAC, regrigerator, dishwasher, clothes washer, clothes dryer), infrastructure (power distribution lines, power transformers, power plants, telephone mainlines), transportation (cars, trucks), industrial equipment	Buildings + Infrastructures	In-use	Global	Multi-national		Sub-Saharan Africa, Centrally planned Asia, North America, Pacific OECD, Western Europe			Multinational		Dynamic	2000	1990-2100	X
Glenk, E; et.al	2000	Bauwesen - Abfallstrategien in der Steiermark: Lageraufbau im Bauwesen (Projekt LAUF)	Report	Report	DE	Kral, U.	mineral materials, concrete, wood, metals, plastics	mass			Buildings, Infrastructure	Buildings + Infrastructures	in-use	Regional			Styria			Regional		Static	-	1971 - 1994	X
Glöser, Simon; Soulier, Marcel ; Tercero Espinoza, Luis A.	2013	Dynamic analysis of global copper flows. Global stocks, postconsumer material flows, recycling indicators, and uncertainty evaluation	Environmental Science and Technology	Journal	EN	Lanau, M.	copper	mass			Consumer & electronics, Industrial, Transport, Infrastructure, Building & Construction	Buildings + Infrastructures	in-use	Global			Global			Global		Dynamic	2010	1960-2010		X
Glöser, Simon; Soulier, Marcel; Espinoza, Luis Tercero; Faulstich, Martin	2013	Using Dynamic Stock & Flow Models for Global and Regional Material and Substance Flow Analysis in the Field of Industrial Ecology: The Example of a Global Copper Flow Model	The 31st International Conference of the System Dynamics Society	Conference	EN	Lanau, M.	Copper	mass			Telecommunication, power utility, plumbing, transport, non-electrical industrial, non-industrial automotive, electronic, electric power, electrical industrial, electrical automotive, diverse, cooling, consumer and general products, communication, building plant, architecture	Broadcast cables + IT cables + power station + water and wastewater pipes + electricity grid + building plant + buildings	in-use	Global			Global			Global		Dynamic	2010	1960-2010		X
Gobbo, Émilie	2015	DÉCHETS DE CONSTRUCTION, MATIÈRES À CONCEPTION Analyse des stocks et flux de matières dans le cadre des opérations de rénovation énergétique en Région de Bruxelles-Capitale	PhD thesis	PhD thesis	FR	Lanau, M.	Construction materials	mass			Building	Buildings	In-use	Building-level			Brussels, Belgium			Building-level		Static	2014		X
Gómez, Fernando; Guzmán, Juan Ignacio; Tilton, John E	2007	Copper recycling and scrap availability	Resources Policy	Journal	EN	Lanau, M.	Copper	mass			Building and construction; Transportation; Consumer durables; Electrical and electronic; Industrial machinery	Anthropogenic	scrap	Global			Global			Global		Dynamic	2005	1966-2005		X
Gontia, Paul; Nägeli, Claudio; Rosado, Leonardo; Kalmykova, Yuliya; Österbring, Magnus	2018	Material-intensity database of residential buildings: A case-study of Sweden in the international context	Resources, Conservation & Recycling	Journal	EN	Lanau, M.	construction materials	mass/floor area			Residential Buildings	Residential Buildings	in-use	National			Sweden	X		National		Static	ca 2013		X
Gordon, R. B.; Bertram, M. & Graedel, T. E.	2006	Metal stocks and sustainability	Proceedings of the National Academy of Sciences	Journal	EN	Lanau, M.	Copper	mass/cap			Infrastructure; Building and construction (Plumbing; Wiring; Air conditioning and refrigeration); Industrial and Domestic Equipment (Industrial, Domestic); Transportation (Motor vehicles; Railway, ships, aircraft)	Buildings + Infrastructures	in-use	National			USA			National		Dynamic	2000	1900-2000		X
Göswein, Verena; Krones, Jonathan; Celentano, Giulia; Fernández, John E.; Habert, Guillaume	2017	Embodied GHGs in a Fast Growing City: Looking at the Evolution of a Dwelling Stock using Structural Element Breakdown and Policy Scenarios	Journal of Industrial Ecology	Journal	EN	Lanau, M.	concrete, steel, fired clay, timber, and corrugated iron	mass/building element	mass/floor area		Residential Buildings	Residential Buildings	in-use	Urban			Johannesburg			Urban		Static	2011		X
Government of Japan	1985	Study for Steel Stock in Japan	Science and Technology Agency, Tokyo	Report	JPN	Mao, R.	Steel	mass			Construction, automobile, ship, machinery	Built environment	in-use	National			Japan			National		Static	1983		X
Gruhler, K; Deilmann, C; Hajek, P; Tywoniak, J; Lupisek, A; Ruzicka, J; Sojkova, K	2010	Despite All Strategies for Enhancing Resource Efficiency, Per Capita Material Stock Is Increasing - Housing Stock and Building Material Flows in Germany 2050	Cesb 10: Central Europe Towards Sustainable Building - From Theory To Practice	Conference	EN	Lanau, M.	overall weight of buildings, undifferentiated materials	mass			housing stock	Residential Buildings	in-use	National			Germany			Regional		Dynamic	2001	2001-2050	X
Guo, Zhen; Hu, Dan; Zhang, Fuhua; Huang, Guolong & Xiao, Qiang	2014	An integrated material metabolism model for stocks of Urban road system in Beijing, China	Science of the Total Environment	Journal	EN	Lanau, M.	Macadam, mineral powder, lime, steel, grit, SMA, Flyash, polyurethane plastics, stone chips, asphalt, cement, APP	mass			Urban road system (Expressways, Arterial roads, Secondary roads, Branch roads, Hutongs, Interchanges, Pedestrian overcrossings)	Roads	in-use	Urban			Beijing, China	X		Object scale (mapped)		Static	2013		X
Guo, Zhen; Shi, Honghua; Zhang, Peidong; Chi, Yuan; Feng, Aiping	2017	Material metabolism and lifecycle impact assessment towards sustainable resource management: A case study of the highway infrastructural system in Shandong Peninsula, China	Journal of Cleaner Production	Journal	EN	Lanau, M.	Sand & Stones, Fly ash, Lime, Cement, Mineral powder, Asphalt, Steel, Glass, Synthetic resin, SMA, Pigments, Aluminum, Plasticizers, Rubber, APP	mass	mass/km		highway infrastructural system	Highway	in-use	Regional			Shandong Peninsula, China			Object scale (mapped)		Static	2013		X
Han, Ji & Xiang, Wei Ning	2013	Analysis of material stock accumulation in China's infrastructure and its regional disparity	Sustainability Science	Journal	EN	Lanau, M.	Steel, sand and gravel, cement, brick, wood, glass, lime, asphalt, plastic, ceramic	mass			Residential Buildings, roads, railways, and water pipelines	Residential Buildings + roads + railways + water pipelines (water and wastewater)	in-use	National			China (31 provinces)			Regional		Dynamic	2008	1978-2008	X
Hashimoto, S., Tanikawa, H., Moriguchi, Y.,	2009	Framework for estimating potential wastes and secondary resources accumulated within an economy - A case study of construction minerals in Japan	Waste Management	Journal	EN	Lanau, M.	Construction minerals in buildings (asphalt concrete; cement concrete; asphalt & cement; sand, gravel & (crushed) stone)	mass			Public and private infrastructures	Agriculture/forestry/fisheries + Roads + Harbours/airports + Sewerage/parks + Railways + Telecommunications + Electricity/gas + Waterworks + Buildings	In-use	National			Japan			National		Dynamic	2000	1970-2000		X
Hashimoto, Seiji; Tanikawa, Hiroki & Moriguchi, Yuichi	2007	Where will large amounts of materials accumulated within the economy go? - A material flow analysis of construction minerals for Japan	Waste Management	Journal	EN	Lanau, M.	Floor space, Asphalt, cement, sand gravel, crushed stone	mass	floor area		Infrastructure, Buildings	Buildings + Infrastructures	in-use	National			Japan			National		Dynamic	1987	1970-2030		X
Hatayama, H., Daigo, I., Matsuno, Y., Adachi, Y.,	2009	Assessment of the recycling potential of aluminum in Japan: the United States, Europe and China	Nippon Kinzoku Gakkaishi/Journal of the Japan Institute of Metals	Journal	EN	Lanau, M.	Aluminum	mass	mass/cap		Building and construction, Transportation, Containers and Packaging, Electrical, Machinery and Equipment, Consumer Durable, Other	Built environment	in-use	National			Japan, US, Europe, China			National		Dynamic	2000	2000-2050		X
Hatayama, H., Daigo, I., Matsuno, Y., Adachi, Y.,	2010	Outlook of the world steel cycle based on the stock and flow dynamics	Environmental Science and Technology	Journal	EN	Lanau, M.	Steel	mass			Civil Engineering, Buildings, Electrical Applicances, Machinery, Vehicles, Shipbuilding, Containers and Packaging, Other	Buildings + Infrastructures	In-use	National			42 countries			National		Dynamic	2005	1980-2005; 2005-2050		X
Hatayama, Hiroki; Tahara, Kiyotaka	2014	Using decomposition analysis to forecast metal usage in the building stock	Building Research & Information	Journal	EN	Lanau, M.	Steel, aluminum, copper, zinc	mass			Building stock	Buildings	in-use	National			Japan			National		Dynamic	2010	2010-2050		X
Hattori, Ryoma; Horie, Sadataka; Hsu, Feng Chi; Elvidge, Chirstopher D.; Matsuno, Yasunari	2013	Estimation of in-use steel stock for civil engineering and building using nighttime light images	Resources, Conservation & Recycling	Journal	EN	Lanau, M.	Steel	mass			Civil engineering, buildings	Buildings + Infrastructures	In-use	National			Asia, Non-Asia		X	1 sq.km	30 arc-s	Static	2006, 2010					X
Hedbrant, J.	2001	Stockhome: a spreadsheet model of urban heavy metal metabolism.	Water, Air, & Soil Pollution	Journal	EN	Lanau, M.	Heavy metals (Cd, Cr, Cu, Pb, Hg, Ni, Zn)	mass			Anthropogenic stock	Anthropogenic	in-use	Urban			Stockholm, Sweden			Urban		Dynamic	1900-2050			X
Heeren, Niko; Hellweg, Stefanie	2018	Tracking construction material over space and time: Prospective and geo-referenced modeling of building stocks and construction material flows	Journal of Industrial Ecology	Journal	EN	Lanau, M.	construction material (brick, combustible, concrete, glass, insulation, metal, mineral, wood), floor area	mass	floor area		Residential Buildings	Residential Buildings	in-use	National			Switzerland	X		Object scale (mapped)		Dynamic	2015	2015-2055	X
Hintemann, R. and Fichter, K.	2010	Materialbestand der Rechenzentren in Deutschland	Report	Report	DE	Kral, U.	iron, copper, aluminium, electronics, plastics, others	mass			data centers	Data centers		National			Germany			National		Static	2008	2015 (prognose)	X
Hirato, T.; Daigo, I.; Matsuno, Y. & Adachi, Y.	2009	In-use Stock of Steel Estimated by Top-down Approach and Bottom-up Approach	Journal of the Iron and Steel Institute of Japan	Journal	EN	Lanau, M.	Steel	mass	mass/cap		1. 7 uses (buildings, civil engineering, machinery, passenger cars, trucks, containers, other products) (Top-down) in Japan 2. Automobiles in Japan (bottom-up) 3. Automobiles in US (bottom-up)	Buildings + Infrastructures	In-use	National			Japan			National		Dynamic	2005	1970-2005		X
Hofer, P., Taverna, R., Werner, F., Kaufmann, E. and Thürig, E	2007	CO2-Effekte der Schweizer Wald- und Holzwirtschaft.	Report	Report	DE	Kral, U.	carbon in wood	mass			Swiss Anthroposphere (timber industry, buildings, waste management, paper industry, energy sector)	Anthropogenic	in-use	National			Switzerland			National		Static	2000		X
Höglmeier, K., G. Weber-Blaschke and K. Richter	2017	Potentials for cascading of recovered wood from building deconstruction—A case study for south-east Germany	Resources, Conservation & Recycling	Journal	EN	Kral, U.	wood	volume	#		Building stock (Residential Buildings; Non-Residential Buildings)	Residential Buildings + Non-Residential Buildings	in-use	Regional			Bavaria, Germany			Regional		Static	2011		X
Hong, Lixuan; Zhou, Nan; Feng, Wei; Khanna, Nina; Fridley, David; Zhao, Yongqiang & Sandholt, Kaare	2016	Building stock dynamics and its impacts on materials and energy demand in China	Energy Policy	Journal	EN	Lanau, M.	floorspace	floor area			Residential and commercial (office, retail, hospital, school, hotel, others) buildings	Residential Buildings + office + retail + hospital + school + hotel + Non-Residential Buildings	In-use	National			China (North Urban, Transition & South Urban, Commercial)			National		Dynamic	2010	2010-2050	X
Hou, Wanxin; Tian, Xin & Tanikawa, Hiroki	2015	Greening China's Wastewater Treatment Infrastructure in the Face of Rapid Development: Analysis Based on Material Stock and Flow through 2050	Journal of Industrial Ecology	Journal	EN	Lanau, M.	Overall (incl. But not differentiating Steel, Gravel, Sand Wood, Cement) and CO2-associated emissions	mass			Wastewater Treatment Infrastructure	Wastewater network	In-use	National			China			National		Dynamic	2010	1980-2050		X
Hsu, Feng-Chi; Daigo, Ichiro; Matsuno, Yasunari; Adachi, Yoshihiro	2011	Estimation of Steel Stock in Building and Civil Construction by Satellite Images	ISIJ International	Journal	EN	Lanau, M.	Steel	mass			Building, Civil Construction	Buildings + Infrastructures	in-use	National			Japan, China, South Korea and Taiwan		X	Regional		Static	2006					X
Hsu, Feng-Chi; Elvidge, Christopher D. & Matsuno, Yasunari	2013	Exploring and estimating in-use steel stocks in civil engineering and buildings from night-time lights	International Journal of Remote Sensing	Journal	EN	Lanau, M.	Steel	mass	mass/cap		civil engineering and buildings	Buildings + Infrastructures	in-use	National			61 countries		X	1 sq.km	30 arc-s	Static	2006					X
Hsu, Feng-Chi; Elvidge, Christopher D; Matsuno, Yasunari	2011	Estimating in-use steel stock of civil engineering and building in China by nighttime light image	Proceedings of the Asia-Pacific Advanced Network	Conference	EN	Lanau, M.	Steel	mass			Civil engineering and Buildings	Non-mobile	in-use	National	Regional		China, Chinese provinces		NTL	Regional		Static	2006					X
Hu, Dan; You, Fang; Zhao, Yanhua; Yuan, Ye; Liu, Tianxing; Cao, Aixin; Wang, Zhen & Zhang, Junlian	2010	Input, stocks and output flows of urban residential building system in Beijing city, China from 1949 to 2008	Resources, Conservation & Recycling	Journal	EN	Lanau, M.	Cement, Sand, Gravel, Steel, Bricks, Timber	mass			Urban residential buildings	Residential Buildings	in-use	Urban			Beijing, China			Urban		Dynamic	2009	1949-2009	X
Hu, Mingming; Bergsdal, Håvard; van der Voet, Ester; Huppes, Gjalt & Müller Daniel B.	2010	Dynamics of urban and rural housing stocks in China	Building Research & Information	Journal	EN	Lanau, M.	floor area	area/year			Urban and rural housing stock	Residential Buildings	in-use	National			China			National		Dynamic	2006	1900-2100		X
Hu, Mingming; Pauliuk, Stefan; Wang, Tao; Huppes, Gjalt; van der Voet, Ester & Müller Daniel B.	2010	Iron and steel in Chinese residential buildings: A dynamic analysis	Resources, Conservation & Recycling	Journal	EN	Lanau, M.	Iron and Steel	mass			Residential Buildings	Residential Buildings	In-use	National			China (esp. Beijing)			National		Dynamic	2005	1900-2100		X
Hu, Mingming; van der Voet, Ester & Huppes, Gjalt	2010	Dynamic Material Flow Analysis for Strategic Construction and Demolition Waste Management in Beijing	Journal of Industrial Ecology	Journal	EN	Lanau, M.	Concrete	mass	floor area		Residential Buildings	Residential Buildings	in-use	Urban			Beijing, China			Urban		Dynamic	2008	1949-2008; 2008-2050		X
Huang, Cheng; Han, Ji & Chen, Wei Qiang	2016	Changing patterns and determinants of infrastructures' material stocks in Chinese cities	Resources, Conservation & Recycling	Journal	EN	Lanau, M.	Ceramic, plastic, glass, sand & gravel, wood, asphalt, lime, cement, brick, steel	mass			Residential Buildings, Non-Residential Buildings, Roads, Railways, gas pipeline, tapwater pipeline, sewer pipeline	Residential Buildings + Non-Residential Buildings+ Roads + Railways + gas pipeline + tapwater pipeline + sewer pipeline	in-use	Urban			Beijing Tianjing Shanghai, China			Urban		Dynamic	2013	1978-2013	X
Huang, Tao; Shi, Feng; Tanikawa, Hiroki; Fei, Jinling & Han, Ji	2013	Materials demand and environmental impact of buildings construction and demolition in China based on dynamic material flow analysis	Resources, Conservation & Recycling	Journal	EN	Lanau, M.	Steel, wood, cement, brick, gravel & sand, asphalt, lime, glass	mass	floor area		Residential Buildings, Non-Residential Buildings	Residential Buildings+ Non-Residential Buildings	In-use	National			China			National		Dynamic	2005	1950-2050		X
International Aluminum Institute	2009	Global Aluminium Recycling : A Cornerstone of Sustainable Development	Report (International Aluminum Institute)	Report	EN	Lanau, M.	aluminum	mass			Buildings, Engineering and Cable, Transport and Automotive, Packaging, Other	Buildings + Infrastructures	in-use	Global			Global			Global		Static	2007						X
Jang, E; Hong, S.-J.; Jung, J.-S.; Lee, J.-Y.; Hur, T	2009	Analysis of Aluminum flow and stock in Korea	Life Cycle Assessment IX "toward the global life cycle economy"	Conference	EN	Lanau, M.	Aluminum	mass	mass/m2		Packaging, construction, automotive, E&E, others	Built environment	in-use	National	Regional	Urban	Korea, 7 cities, 9 regions			National		Dynamic	2007	1980-2007		X
Japan Ferrous Raw Material Association	1999	Vol. 1 (1999)	Japan Ferrous Raw Material Association	Report	JPN	Mao, R.	Steel	mass			anthropogenic stock	Anthropogenic	in-use + hibernating	National			Japan			National		Dynamic	1998	1870-2005		X
Jolly, J. L. W.	2011	The U.S. Copper-base Scrap Industry And Its By-products - An Overview	Report (United States Geological Survey)	Report	EN	Lanau, M.	copper	mass			anthropogenic stock	Anthropogenic	in-use	Global	National		World, US			Global		Dynamic	2010	1951-2010		X
Kalcher, Jasmin; Praxmarer, Gabriel; Teischinger, Alfred	2017	Quantification of future availabilities of recovered wood from Austrian residential buildings	Resources, Conservation & Recycling	Journal	EN	Kral, U.	wood	m3			Residential Buildings	Residential Buildings	in-use	National			Austria			National		Dynamic	2012	2012-2100		X
Kandelaars, Patricia P A A H; van den Bergh, Jeroen C J M	1997	Dynamic analysis of materials-product chains: An application to window frames	Ecological Economics	Journal	EN	Lanau, M.	Number of window frames	#			Residential Buildings	Residential Buildings	in-use	National			Netherlands			National		Dynamic	1990	1960-2050		X
Kapur, Amit; Keoleian, Gregory; Kendall, Alissa & Kesler, Stephen E.	2008	Dynamic modeling of in-use cement stocks in the United States	Journal of Industrial Ecology	Journal	EN	Lanau, M.	Cement	mass	mass/cap		Residential Buildings, Commercial buildings ,Public buildings, Utilities, Streets and highways, Water and Waste Management, Farm, Others	Built environment	In-use	National			USA			National		Dynamic	2005	1900-2005		X
Kleemann, Fritz; Lederer, Jakob; Fellner, Johann	2015	Hochbauten als Wertstoffquelle	Report	Report	DE	Kral, U.	construction materials	mass			9 Selected buildings	Buildings	in-use	Urban			Vienna, Austria			Object scale (mapped)		Static	about 2015		X
Kleemann, Fritz; Lederer, Jakob; Rechberger, Helmut & Fellner, Johann	2016	GIS-based Analysis of Vienna's Material Stock in Buildings	Journal of Industrial Ecology	Journal	EN	Lanau, M.	Bricks/mortar, concrete, wood, steel/iron, and a lots of others (25 materials in total)	mass			Residential Buildings, commercial buildings, industrial buildings	Residential Buildings+ commercial + industrial	in-use	Urban			Vienna	X		sq.m		Dynamic	2013	1918-2013	X
Kleijn, René; Huele, Ruben & Van Der Voet, Ester	2000	Dynamic substance flow analysis: The delaying mechanism of stocks, with the case of PVC In Sweden	Ecological Economics	Journal	EN	Lanau, M.	PVC	mass			Buildings (pipes, roof covering, wallpaper etc…) + autres (packaging, automotives…)	Anthropogenic	in-use	National			Sweden			National		Dynamic	1994	1950-2150		X
Klinglmair, Manfred; Fellner, Johann	2011	Historical iron and steel recovery in times of raw material shortage: The case of Austria during World War I	Ecological Economics	Journal	EN	Lanau, M.	Iron, steel	mass/cap			anthropogenic stock	Anthropogenic	in-use	National			Austria			National		Dynamic	1914	1825-1914		X
Kloft, H., and J. D. Wörner	1999	Investigations of mass and energy flow in existing buildings.	8th International Conference on Durability of Building Materials and Components (8dbmc). CIB W78 Workshop, IT in Construction, Vancouver, Canada	Conference	EN	Lanau, M.	building material	mass/m3			Residential Buildings	Residential Buildings	in-use	building-level			20 german buildings			building-level		Dynamic	Unknown	80 years	X
Kloft, H., Wörner, J., Liebermann, A.	1996	An investigation of the use of building materials in residential premises constructed at different times.	IABSE Congress Report 15	Conference	EN	Lanau, M.	building material	mass/m3			Residential Buildings	Residential Buildings	in-use	Building-level			4 RB in Darmstadt, Germany			Building-level		Static	1996		X
Kozawa, S; Tsukihashi, F	2011	Analysis of global demand for iron source by estimation of in-use steel stock	ISIJ International	Journal	EN	Lanau, M.	steel	mass			architecture, civil engineering, cars, machines, containers, other products	Anthropogenic	in-use, obsolete, production losses	Global			Global			Global		Dynamic	2005	1870-2005		X
Kozawa, Sumio; Hayashi, Seiichi; Tsukihashi, Fumitaka	2008	Analysis of Global Demand for Iron Source by Utility of Stock Hypothesis	ISIJ International	Journal	EN	Lanau, M.	Steel	mass			anthropogenic stock	Anthropogenic	in-use	Global			Global			Global		Dynamic	2000	1870-2000		X
Kozawa, Sumio; Tsukihashi, Fumitaka	2010	Prediction Model of Global Demand for Iron Source by Utility of Stock Hypothesis—Verification of Predictive Power and Outlook for Demand to 2050	ISIJ International	Journal	EN	Lanau, M.	steel	mass			anthropogenic stock	Anthropogenic	in-use	Global			Global			Global		Dynamic	2005	2005-2050					X
Kral, Ulrich; Allesch, Astrid; Rechberger Helmut	2017	Der städtische Untergrund als Rohstoffmine? Potential an Sekundärressourcen in der erdverlegten Infrastruktur. [The urban underground as mine? Potential of secondary resources in underground networks.]	Report	Report	DE	Kral, U.	Concrete, plastic, copper, lead, steel	mass			underground networks (wastewater, water, electricity, gas,….)	water + wastewater + electricity distribution + gas pipe		Regional			Selected regions in Austria	X		Regional		Static	2016	-	X
Kral, Ulrich; Lin, Chih Yi; Kellner, Katharina; Ma, Hwong Wen; Brunner, Paul H.	2014	The Copper Balance of Cities: Exploratory Insights into a European and an Asian City	Journal of Industrial Ecology	Journal	EN	Lanau, M.	Copper	mass/cap			Buildings, Infrastructure, Vehicles, Consumer goods	Buildings + Infrastructures	in-use	Urban			Vienna and Taipei			Urban		Static	2008, 2009		X
Krausmann, Fridolin; Wiedenhofer, Dominik; Lauk, Christian; Haas, Willi; Tanikawa, Hiroki; Fishman, Tomer; Miatto, Alessio; Schandl, Heinz; Haberl, Helmut	2017	Global socioeconomic material stocks rise 23-fold over the 20th century and require half of annual resource use	Proceedings of the National Academy of Sciences	Journal	EN	Lanau, M.	Aggregate/virgin; aggregate/downcycled; bricks/stones/tiles; Asphalt; Concrete; All other metals; Copper; aluminum; Iron/Steel; Plastics; Paper; Solidwood	mass			Anthropogenic stock	Anthropogenic	In-use	Global	Multi-national		Earth, Industrial/China/Rest of the World			Multinational		Dynamic	2010	1900-2010		X
Krook, Joakim; Carlsson, Annica; Eklund, Mats; Frändegård Per & Svensson Niclas"	2011	Urban mining: Hibernating copper stocks in local power grids	Journal of Cleaner Production	Journal	EN	Lanau, M.	Copper	mass			local power grids (burried in soil, airborne)	Power grid	Hibernating & in-use	Urban			Gothenburg & Linköping, Sweden	X		Object scale (mapped)		Static	2008		X
Kun Yuan	2017	Study on the evolution of Chinese provincial construction stock and its influence on material and energy demand	MSc thesis	MSc thesis	CHN	Mao, R.	overall construction stock	m2/cap			Construction stock	Built environment	in-use	National			China			Regional		Dynamic	2010?	1978-2048		X
Laturi, J; Mikkola, J; Uusivuori, J	2008	Carbon reservoirs in wood products-in-use in Finland: current sinks and scenarios until 2050	Silva Fennica	Journal	EN	Lanau, M.	Carbon in wood product	mass			anthropogenic stock	Anthropogenic	in-use	National			Finland			National		Dynamic	2005	1955-2005, 2005-2050		X
Lederer, Jakob; Kleemann, Fritz; Ossberger, Markus; Rechberger, Helmut & Fellner, Johann	2016	Prospecting and Exploring Anthropogenic Resource Deposits: The Case Study of Vienna's Subway Network	Journal of Industrial Ecology	Journal	EN	Lanau, M.	Concrete, Iron and steel, gravel, bricks, aluminum, copper	mass	mass/cap	mass/m2	Subway Network	Subway	in-use, obsolete	Urban			Vienna			Object scale (mapped)		Static	2014		X
Lederer, Jakob; Kral, Ulrich; Brunner, P.H.	2010	Vom Ökologischen Fußabdruck zum Ressourcen- und Umweltmanagement am Beispiel der Wiener Linien (ÖFRU). Arbeitspaket 1: Ökologischer Fußabdruck der U2 Verlängerung	Report	Report	DE	Kral, U.	concrete, steel, aluminium, copper	mass			Extension of subway line N°2 (above and below the ground); streets for car traffic	Subway	in-use	Urban			Vienna, Austria			Urban		Static	about 2010		X
Li, Li; Wania, Frank	2016	Tracking chemicals in products around the world: introduction of a dynamic substance flow analysis model and application to PCBs	Environment International	Journal	EN	Lanau, M.	six PCB congeners: diCB-8, triCB-28, tetraCB-52, pentaCB-118, hexaCB-153 and heptaCB-180	mass			anthropogenic stock	Anthropogenic	in-use stock, waste stock	Global			Global			1 sq.km		Dynamic	2015	1930-2100		X
Liang, Hanwei; Dong, Liang; Tanikawa, Hiroki; Zhang, Ning; Gao, Zhiqiu & Luo, Xiao	2016	Feasibility of a new-generation nighttime light data for estimating in-use steel stock of buildings and civil engineering infrastructures	Resources, Conservation & Recycling	Journal	EN	Lanau, M.	Steel	mass			buildings and civil engineering infrastructures	Buildings + Infrastructures	In-use	National			60 target countries		X	500 sq.m	15 arc-s	Static	2013					X
Liang, Hanwei; Tanikawa, Hiroki; Matsuno, Yasunari & Dong, Liang	2014	Modeling in-use steel stock in China's buildings and civil engineering infrastructure using time-series of DMSP/OLS nighttime lights	Remote Sensing	Journal	EN	Lanau, M.	Steel	mass			buildings and civil engineering infrastructures	Buidlings + infrastructure	In-use	Regional	National		China		X	1 sq.km	30 arc-s	Static	2008					X
Lichtensteiger, Thomas & Baccini, Peter	2008	Exploration of Urban Stocks	J. Environ. Eng. Manage.	Journal	EN	Lanau, M.	Gravel/sand, marl/clay, cement, timber, copper	mass	mass/cap		buildings	Single family house + Multi family house + Service buildings + production building	in-use	National			Switzerland			National		Static	2000	2000	X
Liu, Gang & Müller Daniel B.	2013	Centennial evolution of aluminum in-use stocks on our aluminized planet	Environmental Science and Technology	Journal	EN	Lanau, M.	Aluminum	mass/cap			Building & construction, Transportation, Container & Packaging, Machinery and Equipment, Electrical Engineering, Consumer Durables, Other uses	Built environment	In-use (geological reserves + anthropogenic reserves)	National			All countries			National		Dynamic	2010	1900-2010		X
Liu, Gang; Bangs, Colton E. & Müller Daniel B.	2011	Unearthing potentials for decarbonizing the U.S. aluminum cycle	Environmental Science and Technology	Journal	EN	Lanau, M.	Aluminum	mass	mass/cap		Building & construction, Transportation, Packaging, Machinery and Equipment, Electrical, Consumer Durables, Other uses (non destructive, destructive)	Built environment	In-use	National			USA			National		Dynamic	2006	1900-2006		X
Liu, Gang; Bangs, Colton; Müller, Daniel B.	2013	Stock Dynamics and Emission Pathways of the Global Aluminum Cycle	Nature Climate Change	Journal	EN	Lanau, M.	Aluminum	mass/cap			Anthropogenic stock	Anthropogenic	in-use	Global	National		Global, Australia, Brazil, China, France, Germany, India, Italy, Japan, Netherlands, Spain, U.K., U.S.			National		Dynamic	2009	1950-2009; 2009-2100		X
Lohm, U; et.al	1998	Urban Metabolism. Metals in Stockholm. Annex 2 in the summary report on "Materials Accounting as a Tool for Decision Making in Environmental Policy (Mac TEmPo), online available: https://publik.tuwien.ac.at/files/PubDat_143963.pdf	EC Environmental Research Programme - Research Area III - Economic and Social Aspects of the Environment - Summary Report	Report	EN	Kral, U.	mercury, cadmium, nickel, chromium, zinc, lead, copper	mass			household, infrastructure, buildings, vehicles, industry	Buildings + Infrastructures		Urban			Stockholm			Urban		Static	1995		X
LOU Yu , SHI Lei	2008	Analyzing Iron and Aluminum Stocks in Handan City in 2005	RESOURCES SCIENCE(In Chinese)	Journal	CHN	Mao, R.	Iron, Aluminum	mass/cap			Anthropogenic stock	Anthropogenic	in-use	Urban			Handan, China			Urban		Static	2005		X
Lwin, Cherry Myo; Dente, Sébastien M.R.; Wang, Tao; Shimizu, Toshiyuki; Hashimoto, Seiji	2016	Material stock disparity and factors affecting stocked material use efficiency of sewer pipelines in Japan	Resources, Conservation & Recycling	Journal	EN	Lanau, M.	construction materials	mass	mass/cap		Sewer pipelines	Wastewater network	in-use	National	Regional		Japan, all prefectures			Regional		Dynamic	2012	1984-2012	X
Mao, J. S.; Graedel, T. E.	2009	Lead in-use stocks: A dynamic analysis. In review	ISIJ International	Journal	EN	Lanau, M.	lead	mass	mass/cap		anthropogenic stock	Anthropogenic	in-use	Global	Multinational		World, North America; Europe; Commonwealth of Independent States; Latin America and the Caribbean; Africa; Middle East; Oceania Kingdom			Multinational		Dynamic	2000	1900-2000		X
Mao, Ruichang; Duan, Huabo; Gao, Hongguang; Wu, Huanyu	2016	Characterizing the Generation and Management of a New Construction Waste in China: Glass Curtain Wall	Procedia Environmental Sciences	Conference	EN	Lanau, M.	glass curtain wall	m2			Buildings	Buildings	in-use	Neighborhood			Nanshan district, Shenzhen, China			Neighborhood		Static	2015		X
Marcellus-Zamora, Kimberlee A.; Gallagher, Patricia M.; Spatari, Sabrina & Tanikawa, Hiroki	2016	Estimating Materials Stocked by Land-Use Type in Historic Urban Buildings Using Spatio-Temporal Analytical Tools	Journal of Industrial Ecology	Journal	EN	Lanau, M.	Brick, concrete, metal, glass, others	mass			Historic urban buildings	Buildings	in-use	Neighborhood			2.6 sq.m. Philadelphia	X		Object scale (mapped)		Dynamic	2004	2004, 2006, 2008, 2010, 2012	X
Mastrucci, Alessio; Marvuglia, Antonino; Popovici, Emil; Leopold, Ulrich & Benetto, Enrico	2016	Geospatial characterization of building material stocks for the life cycle assessment of end-of-life scenarios at the urban scale	Resources, Conservation & Recycling	Journal	EN	Lanau, M.	Overall (incl. glass, metals, wood, others, other inerts, masonry, concrete)	mass			Multi-family housing, Single family housing	Single Family House + Multi Family House	in-use	Urban			Esch-sur-Alzette, Luxembourg	X		hectare		Static	2014		X
Mata, É; Sasic Kalagasidis, A.; Johnsson, F.	2014	Building-stock aggregation through archetype buildings: France, Germany, Spain and the UK	Building and Environment	Journal	EN	Lanau, M.	heated floor area	area			Buildings	Buildings	In-use	National			France, Germany, UK, Spain			National		Static	France RB: 2005; France NRB: 2009; Spain RB: 2005; Spain NRB: 2009; UK RB+NRB: 2010; Germany RB: 2009		X
Maung, Kyaw Nyunt; Hashimoto, Seiji; Mizukami, Mizuki; Morozumi, Masataka; Lwin, Cherry Myo	2017	Assessment of the Secondary Copper Reserves of Nations	Environmental Science and Technology	Journal	EN	Lanau, M.	Copper	mass			building and construction, infrastructure, industrial equipment, transport, and consumer products	Anthropogenic	Secondary Resources, Secondary Reserves	National			China, Germany, Italy, Japan, Korean Republic, Spain, and the United States			National		Dynamic	2010	1960-2010		X
Maung, Kyaw Nyunt; Yoshida, Tomoharu; Liu, Gang; Lwin, Cherry Myo; Muller, Daniel B.; Hashimoto, Seiji	2017	Assessment of secondary aluminum reserves of nations	Resources, Conservation & Recycling	Journal	EN	Lanau, M.	Aluminum	mass	mass/cap		Building and construction; Transportation; Electrical Engineering; Machinery and Equipment; Containers and Packaging; Consumer Durables; Other Uses	Anthropogenic	secondary reserves	National			19 countries (incl. USA, China, Japan)			National		Dynamic	2010	1980-2010		X
McMillan, Colin A.; Moore, Michael R.; Keoleian, Gregory A.; Bulkley, Jonathan W.	2010	Quantifying U.S. aluminum in-use stocks and their relationship with economic output	Ecological Economics	Journal	EN	Lanau, M.	Aluminum	mass			Construction, consumer durables, containers and packaging, electrical, machinery and equipment, transportation, other	Built environment	in-use	National			USA			National		Dynamic	2007	1900-2007		X
Meinel, Gotthard; Hecht, Robert & Herold, Hendrik	2009	Analyzing building stock using topographic maps and GIS	Building Research & Information	Journal	EN	Lanau, M.	buildings	volume	floor area		Buildings (Residential Buildings; Non-Residential Buildings)	Buildings	in-use	Urban			Dresden, Bonn, Germany	X		Object scale (mapped)		Dynamic	over 20 years		X
Merl, A. D.	2005	Ressourcenmanagement in urbanen Räumen : Fallstudie Wien Nachhaltiger Einsatz von Holz im Rohbau	PhD thesis	PhD thesis	DE	Kral, U.	Wood	mass			Buildings	Buildings	in-use	Urban			Vienna			Urban		static	2001	2001-2101	X
Mesta, Carlos; Kahhat, Ramzy; Santa-Cruz, Sandra	2018	Geospatial Characterization of Material Stock in the Residential Sector of a Latin-American City	Journal of Industrial Ecology	Journal	EN	Lanau, M.	construction material	mass	mass/cap		Residential Buildings	Residential Buildings	in-use	urban			Chiclayo, Peru	X		sq.m		Static	2007		X
Miatto, Alessio; Schandl, Heinz; Wiedenhofer, Dominik; Krausmann, Fridolin; Tanikawa, Hiroki	2017	Modeling material flows and stocks of the road network in the United States 1905–2015	Resources, Conservation & Recycling	Journal	EN	Lanau, M.	Rammed earth, gravel, sand, cement, bitumen	mass	length		roads	Roads	in-use	National			USA			National		Dynamic	2015	1902-2015	X
Müller Daniel B, Wang Tao, Duval Benjamin & Graedel T. E.	2006	Exploring the engine of anthropogenic iron cycles	Proceedings of the National Academy of Sciences	Journal	EN	Lanau, M.	Iron	mass			Iron ore, pig iron, castings, raw steel; finished steel, final products total, scrap (excl. Home scrap)	Built environment	anthropogenic and geogenic	National			USA			National		Dynamic	2004	1900-2004		X
Müller Daniel B.	2006	Stock dynamics for forecasting material flows: Case study for housing in The Netherlands	Ecological Economics	Journal	EN	Lanau, M.	Concrete	mass	floor area		Residential Buildings	Residential Buildings	in-use	National			Netherlands			National		Dynamic	2003	1900-2100		X
Müller Daniel B.; Wang Tao & Duval Benjamin	2011	Patterns of iron use in societal evolution	Environmental Science and Technology	Journal	EN	Lanau, M.	Iron	mass	mass/cap		Construction, transportation, machinery and appliances, other	Built environment	in-use	Global	National		Australia, Canada, France, Japan, UK, US: Global			National		Dynamic	2005	1900-2005		X
Müller, D B; Liu, G; Løvik, A N; Modaresi, R; Pauliuk, S; Steinhoff, F S; Brattebø, H	2013	Carbon emissions of infrastructure development	Environmental Science and Technology	Journal	EN	Lanau, M.	steel, cement and aluminum	mass			Infrastructure	Infrastructure	in-use	Global			Global			National		Dynamic	2010	1950-2010		X
Müller, Daniel	1998	Modellierung, Simulation und Bewertung des regionalen Holzhaushaltes	PhD Thesis	PhD thesis	DE	Kral, U.	Wood	mass			buildings, forest, paper stock	Anthropogenic		Regional			Swiss Lowlands region Olten-Oensingen-Zofingen, Switzerland			Regional		Dynamic	1996	1900-2100	X
Müller, Daniel B; Bader, Hans-Peter; Baccini, Peter	2004	Long-term coordination of timber production and consumption using a dynamic material and energy flow analysis	Journal of Industrial Ecology	Journal	EN	Lanau, M.	Timber	mass			Buildings	Buildings	in-use	Regional			Swiss lowland region			Regional		Dynamic	1997	1900-2100		X
Murase, T; Kawase, R; Matsuoka, Y	2006	Material Stock and Waste Generation by Human Activities Over the Past 100 Years	The Third World Congress of the Environmental and Resource Economists	Conference	EN	Lanau, M.	Wood, cement, steel	mass	mass/cap		Buildings, Civil engineering structures, Machinery and Equipment, Furnitures and fixtures	Buildings + Infrastructures	in-use	National			Japan			National		Dynamic	2001	1880-2001		X
Nathan Associates	2004	The National Inventory of Obsolete Copper Scrap	Report submitted by Nathan Associates to Bureau of Industry & Security Department of Commerce Washington DC	Report	EN	Lanau, M.	copper	mass			Building and Construction, Electrical and Electrronic Products, Industrial Machinery and Equipment, Transportation Equipment, Consumer and General Products	Anthropogenic	hibernating	National			USA			National		Dynamic	2003	1982-2003					X
Neelis, M.; Patel, M.	2006	Long-term Production, Energy Consumption and CO2 Emission Scenarios for the Worldwide Iron and Steel Industry	Report (Report prepared by the Department of Science, Technology and Society/Copernicus Institute at Utrecht University, Utrecht)	Report	EN	Lanau, M.	Steel	mass			anthropogenic stock	Anthropogenic	in-use	Global			Global			Global		Dynamic	2003	1900-2003		X
Obernosterer, R., et al.	2005	Nachhaltige FCKW Bewirtschaftung Österreich. [Sustainable CFC management in Austria.]	Report	Report	DE	Kral, U.	Chlorofluorocarbon (CFC) in insulating material	mass			Construction sector	Built environment	in-use	National			Austria			National		Static	2003		X
Oda, Junichiro; Akimoto, Keigo; Tomoda, Toshimasa	2013	Long-term global availability of steel scrap	Resources, Conservation & Recycling	Journal	EN	Lanau, M.	steel	mass			civil engineering, buildings, machinery and appliances, transport (vehicles, buses, trucks, and trains); shipbuilding; others (containers, furniture, and miscellaneous goods)	Anthropogenic	in-use, discarded	Global			Global			Global		Dynamic	2013	1870-2012/2013-2100		X
Oda, Takafumi; Daigo, Ichiro; Matsuno, Yasunari; Adachi, Yoshihiro	2010	Substance Flow and Stock of Chromium Associated with Cyclic Use of Steel in Japan	ISIJ International	Journal	EN	Lanau, M.	chromium	mass			Use of steel (anthropogenic stock of steel)	Anthropogenic	in-use	National			Japan			National		Dynamic	2005	1980-2005		X
Olaya, Yris; Vásquez, Felipe; Müller, Daniel B.	2017	Dwelling stock dynamics for addressing housing deficit	Resources, Conservation & Recycling	Journal	EN	Lanau, M.	Dwellings	#			Residential Buildings	Residential Buildings	in-use	National			Columbia			National		Dynamic	2016	2016-2100		X
Ortlepp, R., et al.	2017	Grundlagen für materialeffizientes Planen und Bauen	Bautechnik	Journal	DE	Kral, U.	concrete, bricks, wood, insulation material, roofing material, metals, plaster & screed & mortar, coverings and seals, fills and other materials	mass			Buildings, (Non-residential and residential)	Buildings		National			Germany			National		Static	2010		X
Ortlepp, Regine; Gruhler, Karin & Schiller, Georg	2015	Material stocks in Germany's non-domestic buildings: a new quantification method	Building Research & Information	Journal	EN	Lanau, M.	Plaster screed mortar, concrete, masonry, building boards, wood, insulation materials, roof covering, floorings, other materials, metals	mass	floor area		Non-Residential Buildings	Non-Residential Buildings	in-use	National			Germany			National		Static	2010 (c.a.)		X
Ortlepp, Regine; Gruhler, Karin; Schiller, Georg	2018	Materials in Germany’s domestic building stock: calculation model and uncertainties	Building Research & Information	Journal	EN	Lanau, M.	construction materials	mass	mass/m2	mass/m3	Multi-Family housing	Multi family house	in-use	National			Germany			National		Static	2010		X
Ott, C., Kral, U. and Brunner, P.H.	2012	Vom Ökologischen Fußabdruck zum Ressourcen- und Umweltmanagement am Beispiel der Wiener Linien (ÖFRU). Arbeitspaket 2: Ressourcen- und umweltbezogene Wissensbasis für die Wiener Linien	Report	Report	DE	Kral, U.	soil, concrete, steel, bricks, glas, natural stone, rubber for railroad, aluminium, gravel, material for sleepers	mass			Extension of subway line N°2 (above and below the ground): Stations, tunnels, railroad, bridges, escalators, elevators, cables, pipes, control-command system etc.	Subway	in-use	Urban			Vienna, Austria			Urban		Static	about 2010	-	X
Panasiyk, Daryna; Laratte, Bertrand; Remy, Sebastien	2016	Steel Stock Analysis in Europe from 1945 to 2013	Procedia CIRP	Conference	EN	Lanau, M.	Steel	mass			Metal goods, other transport, domestic electronic equipment, mechanical engineering, automotive, construction	Built environment	in-use	Multinational			EU 27			Multinational		Dynamic	2013	1945-2013		X
Park, J.A., Hong, S.J., Kim, I., Lee, J.Y., Hur, T.	2011	Dynamic material flow analysis of steel resources in Korea	Resources, Conservation & Recycling	Journal	EN	Lanau, M.	Steel	mass			Machinery/metal products, construction products, electrical/electronic devices, transportation equipment, other equipment, scrap disposal	Built environment	in-use	National			Korea			National		Dynamic	2008	1993-2020		X
Pauliuk, S., Milford, R.L., Müller, D.B., Allwood, J.M.	2013	The steel scrap age	Environmental Science and Technology	Journal	EN	Lanau, M.	Steel	mass	mass/cap		construction, transport, industrial equipment (machinery), and metal products and containers	Built environment	In-use	Global	Multi-national		North America, Latin America, Europe, Former USSR, Africa, Middle East, India, China, developed Asia, developing Asia			Multinational		Dynamic	2008	1950-2100		X
Pauliuk, Stefan; Venkatesh, G.; Brattebø, Helge & Müller, Daniel B.	2014	Exploring urban mines: pipe length and material stocks in urban water and wastewater networks	Urban Water Journal	Journal	EN	Lanau, M.	length	mass	length		urban water and wastewater networks: pipes	Water pipes + wastewater pipes	in-use	Urban			Oslo, Stavanger, Norway			Urban		Static	2014						X
Pauliuk, Stefan; Wang, Tao & Müller, Daniel B.	2013	Steel all over the world: Estimating in-use stocks of iron for 200 countries	Resources, Conservation & Recycling	Journal	EN	Lanau, M.	Steel	mass/cap			137 product categories from UN Comtrade to estimate trade on all stages	Anthropogenic	In-use	National			200 countries			National		Dynamic	2008	1700-2008		X
Pauliuk, Stefan; Wang, Tao & Müller, Daniel B.	2012	Moving toward the circular economy: The role of stocks in the Chinese steel cycle	Environmental Science and Technology	Journal	EN	Lanau, M.	Steel	mass	mass/cap		Construction, transportation, machinery, appliances, other	Built environment	In-use	National			China			National		Dynamic	2009	1940-2100		X
Pingoud, K., A. L. Perälä	2000	Studies on greenhouse impacts of wood construction. 1. Scenario analysis of potential wood utilisation in Finnish new construction in 1990 and 1994. 2. Inventory of carbon stock of wood products in the Finnish building stock in 1980, 1990 and 1995.	Report (VTT - Research group in Finland)	Report	EN	Lanau, M.	Carbon stocked in wood	mass			Building stock	Buildings	in-use	National			Finland			National		Static	1980, 1990, 1995		X
Quinn, David; Fernandez, John E	2010	Estimating Material Usage of Road Infrastructure in US Cities	Fourth National Conference of IBPSA-USA, August 11 – 13, 2010	Conference	EN	Lanau, M.	road	length	length/cap		Road infrastructure	Roads	in-use	Urban			40 US cities			sq.m		Static	2000						X
Rauch JN, Graedel TE	2007	Earth’s anthrobiogeochemical copper cycle	Global Biogeochemical Cycles	Journal	EN	Lanau, M.	Copper	mass			anthropogenic stock	Anthropogenic	anthropogenic stock	Global			Global			Global		Dynamic	1990	1890-1990		X
Rauch, J. ; Eckelman, M.; Gordon, R. B.	2007	Copper In-use Stock and Copper Scrap in the State of Connecticut, USA	Yale School of Forestry & Environmental Studies - Working paper	Working Paper	EN	Lanau, M.	Copper	mass	mass/cap		Transportation, Buildings, Equipment, Infrastructure	Residential Buildings + commercial + industrial + water distribution + nat gas distrib + electricity pwr gtion + electricity pwr distrib + railways + telecommunication	in-use, obsolete	Regional			Connecticut, USA			Regional		Static	2000		X
Rauch, Jason N.	2009	Global mapping of Al, Cu, Fe, and Zn in-use stocks and in-ground resources	Proceedings of the National Academy of Sciences	Journal	EN	Lanau, M.	Al, Cu, Fe, Zn	mass/m2	mass/cap		anthropogenic stock	Anthropogenic	In-use, in-ground resources	Global			Global			1 sq.km		Static	2000					X
Rauch, Jason N; Pacyna, Jozef M	2009	Earth's global Ag, Al, Cr, Cu, Fe, Ni, Pb, and Zn cycles	Global Biogeochemical Cycles	Journal	EN	Lanau, M.	Ag, Al, Cr, Cu, Fe, Ni, Pn, Zn	mass			Anthropogenic stock	Anthropogenic	Anthropogenic stock	Global			Global			Global		Static	2000		X
Recalde, Korinti; Wang, Jinlong; Graedel, T. E.	2008	Aluminium in-use stocks in the state of Connecticut	Resources, Conservation & Recycling	Journal	EN	Lanau, M.	Aluminum	mass	mass/cap		Packaging, Equipment, Transport, Building and Infrastructures	Built environment	in-use	Regional			Connecticut state, USA			Regional		Static	2000		X
Redle, M.	1999	Kies- und Energiehaushalt urbaner Regionen in Abhängigkeit der Siedlungsentwicklung	PhD Thesis	PhD thesis	DE	Kral, U.	sand, gravel, stones	mass			buildings, infrastructure (roads)	buildings + roads		Regional			Region "Kreuzung Schweizer Mittelland"			Regional		Dynamic	2000	2000, 2050					X
Redle, M. and Baccini,	1998	Stadt mit wenig Energie, viel Kies und neuer Identität. Metabolische Modelle für den Umbau urbaner Siedlungen am Beispiel der Wohngebäude	Gaia	Journal	DE	Kral, U.	sand, gravel	mass			buildings	Buildings		National			Switzerland			National		Dynamic	2000	1910-2050			X
Reyna, Janet L.; Chester, Mikhail V.	2015	The Growth of Urban Building Stock: Unintended Lock-in and Embedded Environmental Effects	Journal of Industrial Ecology	Journal	EN	Lanau, M.	# dwellings	#			Residential Buildings	Residential Buildings	in-use	Urban			Los Angeles County, California, USA			Urban		Dynamic	2008	1900-2008			X
Richards, Gary P; Borough, Chris; Evans, David; Reddin, Ainslie; Ximenes, Fabiano; Gardner, David	2007	Developing a carbon stocks and flows model for Australian wood products	Australian Forestry	Journal	EN	Lanau, M.	Carbon in wood product	mass			Wood products	Anthropogenic	in-use + landfill	National			Australia			National		Dynamic	2003	1990-2003		X
Rostkowski, K.; Rauch, J.; Drakonakis, K.; Reck, B.;Gordon,R. B.; Graedel, T. E.	2007	"Bottom-up″ study of in-use nickel stocks in New Haven	Resources, Conservation & Recycling	Journal	EN	Lanau, M.	Nickel	mass	mass/cap		Building and Infrastructure, Transportation, Industrial Machinery, Household Appliances and Electronics, and Metal Goods and Other End Uses	Built environment	In-use	Urban			New Haven, USA			Urban		Static	2000		X
Rouvreau, L.; Michel, P.; Serrand, M.; Montfort-Climent, D.; Jayr, E. & Papinot, P.-E.	2012	Rapport final du projet ANR ASURET : Analyse de flux de matiére du secteur de la construction à l'échelle de l'ouvrage et du territoire	Report (public report, supported by the city of Orléans; project ANR - ASURET)	Report	FR	Lanau, M.	Non-metallic minerals, metals, wood, glass, plastic, bitumen	mass			Buildings; road, rail, water, gas and electricity networks	Buildings + road + rail + water + gas + electricity networks	in-use	Urban			Orléans, France			Urban		Static	2004-2006		X
Rubli, Stefan	2016	Bauabfälle in der Schweiz - Tiefbau	Report	Report	DE	Kral, U.	sand & gravel, asphalt, concrete, bricks, other materials	mass	mass/cap		civil engineering sector	Infrastructure		National			Switzerland			Regional	On the level of Cantons	Static	2013						X
Rubli, Stefan et.al	2013	Dynamische Modellierung der Asphalt- sowie PAK-Lager und Flüsse in den Strassen der Region St. Gallen, Thurgau, Zürich und Fürstentum Liechtenstein. [Dynamic modeling of asphalt and PAH-stocks and flows in roads of the districts St. Gallen, Thurgau, Zürich and the Principality of Liechtenstein.]	Report	Report	DE	Kral, U.	Asphalt, PAH	mass			Road construction	Roads	in-use	Regional			St. Gallen, Thurgau, Zürich und Fürstentum Liechtenstein			Regional		Dynamic	2012	1960-2035	X
Ruhrberg, M.	2006	Assessing the recycling efficiency of copper from end-of-life products in Western Europe.	Resources, Conservation & Recycling	Journal	EN	Lanau, M.	copper	mass			anthropogenic stock	Anthropogenic	in-use	Multinational			Western Europe (EU 15 + Norway + Switzerland)			Multinational		Dynamic	1999	1945-1999		X
Ryutaro Terakado, Kazue Ichino Takahashi, Ichiro Daigo, Yasunari Matsuno and Yoshihiro Adachi	2009	Estimation of In-Use Stock of Copper in China, Korea and Taiwan	Journal of the Japan Institute of Metals and Materials	Journal	JPN	Mao, R.	copper	mass			car, cable for power,cable for conmmunication,cable for train, buildings , constructions,electric machinery	Anthropogenic	in-use	National			Japan,China,Taiwan			National		Dynamic	2005	1990-2005		X
Ryutaro Terakado, Kazue Ichino Takahashi, Ichiro Daigo, Yasunari Matsuno and Yoshihiro Adachi	2009	In-Use Stock of Copper in Japan Estimated by Bottom-Up Approach	Journal of the Japan Institute of Metals and Materials	Journal	JPN	Mao, R.	copper	mass	mass/$		car, cable for power,cable for conmmunication,cable for train, buildings , construction,electric machinery	cable for power + cable for conmmunication + buildings + infrast	in-use	National			Japan			National		Dynamic	2005	1990-2005	X
Sandberg, Bergsdal, Håvard; & Brattebø, Helge	2011	Historical energy analysis of the Norwegian dwelling stock	Building Research & Information	Journal	EN	Lanau, M.	Floor area, CO2eq (energy consumption and environmental impact)	mass	floor area		Residential Buildings	Residential Buildings	in-use	National			Norway			National		Dynamic	2004	1960-2004		X
Sandberg, Nina Holck & Brattebø, Helge	2012	Analysis of energy and carbon flows in the future Norwegian dwelling stock	Building Research & Information	Journal	EN	Lanau, M.	Floor area, CO2eq (energy consumption and environmental impact)	mass	floor area		Residential Buildings	Residential Buildings	in-use	National			Norway			National		Dynamic	2000	2000-2050		X
Sandberg, Nina Holck; Sartori, Igor & Brattebø, Helge	2014	Using a dynamic segmented model to examine future renovation activities in the Norwegian dwelling stock	Energy and Buildings	Journal	EN	Lanau, M.	Number of dwellings	#			Residential Buildings	Residential Buildings	in-use	National			Norway			National		Dynamic	2011	1800-2050		X
Sandberg, Nina Holck; Sartori, Igor; Heidrich, Oliver; Dawson, Richard; Dascalaki, Elena; Dimitriou, Stella; Vimmr, Tomás; Filippidou, Faidra; Stegnar, Gasper; sijanec Zavrl, Marjana & Brattebø, Helge	2016	Dynamic building stock modelling: Application to 11 European countries to support the energy efficiency and retrofit ambitions of the EU	Journal of Cleaner Production	Journal	EN	Lanau, M.	Number of dwellings	#			Residential Buildings	Residential Buildings	in-use	National			11 european countries			National		Dynamic	2015	1900-2050		X
Sandberg, Nina Holck; Sartori, Igor; Vestrum, Magnus I. & Brattebø, Helge	2016	Explaining the historical energy use in dwelling stocks with a segmented dynamic model: Case study of Norway 1960-2015	Energy and Buildings	Journal	EN	Lanau, M.	Floor area	mass	floor area		Residential Buildings	Residential Buildings	in-use	National			Norway			National		Dynamic	2015	1960-2015		X
Sandberg, Nina Holck; Sartori, Igor; Vestrum, Magnus I.; Brattebø, Helge	2017	Using a segmented dynamic dwelling stock model for scenario analysis of future energy demand: The dwelling stock of Norway 2016–2050	Energy and Buildings	Journal	EN	Lanau, M.	heated floor area	area			Residential Buildings	Residential Buildings	in-use	National			Norway			National		Dynamic	2016	1960-2050		X
Sartori, Igor; Bergsdal, Håvard; Muller, Daniel B.; Brattebø, Helge	2008	Towards modelling of construction, renovation and demolition activities: Norway's dwelling stock, 1900-2100	Building Research & Information	Journal	EN	Lanau, M.	floor area	m2 (floor area)			Residential Buildings	Residential Buildings	in-use	National			Norway			National		Dynamic	2001	1900-2100		X
Scharp, Michael	2011	Materialbestand und Materialflüsse der IuK - Infrastrukturen: Mobilfunk	Report	Report	DE	Kral, U.	electronics, aluminium, steel, copper, others, n.a., plastics, collant , lead	mass			mobile telephone infrastructure	mobile phone infrastructure		National			Germany			National		Static	No ref year given (about 2008)		X
Schebek, Liselotte; Schnitzer, Benjamin; Blesinger, Daniel; Köhn Antonia; Miekley Britta; Linke Hans Joachim; Lohmann Andreas; Motzko Christoph & Seemann Axel	2016	Material stocks of the non-residential building sector: The case of the Rhine-Main area	Resources, Conservation & Recycling	Journal	EN	Lanau, M.	Ferrous metals (i.e. stainless and special steels, construction iron, reinforcement iron, cast iron); copper; aluminum; concrete; masonry, brick & tiles; wood; glass; other	volume	mass/volume	mass	Non-Residential Buildings	Non-Residential Buildings	in-use	Urban			Frankfurt-Rhine-Main area, Germany			Urban		Static	2011		X
Schiller, Georg; Müller Felix & Ortlepp Regine	2016	Mapping the anthropogenic stock in Germany: Metabolic evidence for a circular economy	Resources, Conservation & Recycling	Journal	EN	Lanau, M.	metal; plastic; wood; minerals (gypsum, float glass, mineral wool, concrete, aered concrete, bricks, calcium silicate)	mass			Buildings (Residential Buildings; Non-Residential Buildings); building services; infrastructure; consumer goods	Buildings + Infrastructures	anthropogenic stock	National			Germany			National		Dynamic	2010	1960-2010	X	X
Schneider, M. and S. Rubli	2009	Dynamische Stoffflussanalyse der mineralischen Baustoffe der Stadt Zürich 1995–2050	Report	Report	DE	Kral, U.	concrete, bricks, sand and gravel, asphalt, insulation material, metals	mass			Construction sector (buildings, infrastructure)	Built environment	in-use	Regional			Canton of Zurich, Switzerland			Regional		Dynamic	2005	1995-2050		X
Schneider, M. and S. Rubli	2007	Ressourcenmodell mineralischer Baustoffe auf der Ebene Stadt Zürich.	Report	Report	DE	Kral, U.	concrete, bricks, sand and gravel, asphalt, gypsum & ceramics & glass	mass			Construction sector (buildings, infrastructure)	Built environment	in-use	Regional			Canton of Zurich, Switzerland			Regional		Static	2005		X
Shi, Feng; Huang, Tao; Tanikawa, Hiroki; Han, Ji; Hashimoto, Seiji & Moriguchi, Yuichi	2012	Toward a low carbon-dematerialization society: Measuring the materials demand and co 2 emissions of building and transport infrastructure construction in China	Journal of Industrial Ecology	Journal	EN	Lanau, M.	Cement, steel, CO2 emissions	mass			Building and transport infrastructure	Residential Buildings + Non-Residential Buildings + roads + railways	in-use	National			China			National		Dynamic	2005	1950-2050		X
Shimomura, Y.; Hayashi, S.	2005	?	Bulletin of The Iron and Steel Institute of Japan (Ferrum)	Journal	JPN	Mao, R.	steel	mass			anthropogenic stock	Anthropogenic	in-use + hibernating	Global			Global			Global		Dynamic	2003	1865-2003		X
Sörme, L.; Bergbäck, B.; Lohm, U.	2001	Century perspective of heavy metal use in urban areas - A case study in Stockholm	Water, Air, & Soil Pollution	Journal	EN	Lanau, M.	Heavy metals (Cd, Cr, Cu, Pb, Hg, Ni, Zn)	mass			infrastructure, buildings, households, enterprises and vehicles	Buildings + Infrastructures	in-use	Urban			Stockholm			Urban		Static	1995						X
Spatari, S.; Bertram, M.; Gordon, R. B.; Henderson, K.; Graedel, T. E.	2005	Twentieth century copper stocks and flows in North America: A dynamic analysis	Ecological Economics	Journal	EN	Lanau, M.	Copper	mass			building and construction, transportation equipment, industrial electrical and electronic equipment, consumer electrical and electronic equipment	Buildings + Infrastructures	in-use, deposits	Multinational			North America (US, Canada, Mexico)			Multinational		Dynamic	1999	1900-1999		X
Stark, W., Vogel-Lahner, T. and Frühwirth, W.	2003	Bauwerk Österreich - Management von Baurestmassen nach den Gesichtspunkten der optimalen Ressourcennutzung und des langfristigen Umweltschutzes anhand der Güter- und Stoffbilanz des „Bauwerks Österreich“.	Report	Report	DE	Kral, U.	soil, metals, wood, plastics (e.g. insulation material, pipes, …), bitumina (e.g. in asphalt), combined materials (mineral materials combined with organic materials such as gypsum boards, …), construction chemicals (adhesion, seals, etc.)	mass			Construction sector (buildings, infrastructure), Landfills	Buildings + Infrastructures	in-use	National			Austria			National		Static	No exact refrence year. Data from 1991 - 2001		X
Steger, S., M. Fekkak and S. Bringezu	2011	Materialbestand und Materialflüsse in Infrastrukturen [Material stock and material flow in infrastructure]	Report	Report	DE	Kral, U.	Aggregated material caterogories: Mineral materials (concrete, sand, gravel, cement, other minral materials), metals (iron/steel, copper, aluminium, other metals), plastics and other materials (plastics, isolation material, wood, other materials)	mass			Infrastructure for traffic, water and wastewater, energy (incl. Energy production)	Infrastructure	in-use	National			Germany			National		Static	about 2009 (not exactly defined)		X
Stephan, André; Athanassiadis, Aristide	2017	Quantifying and mapping embodied environmental requirements of urban building stocks	Building and Environment	Journal	EN	Lanau, M.	Overall material stock + embodied-Energy, -GHG Emissions, -Water	mass			urban building stock	Non-Residential Buildings + Multi-Family + Parking house + warehouse + Single Family + Retail + hospital	in-use	Urban			Melbourne, Australia	X		Object scale (mapped)		Static	2015		X
Sullivan, D.E.	2005	Metal stocks in use in the United States: U.S. Geological Survey Fact Sheet 2005	U.S. Geological Survey - Fact sheet 2005-3090	Report	EN	Lanau, M.	Aluminum, Copper, Steel	mass			transportation, construction, cans and containers, and other goods	Anthropogenic	in-use	National			US			National		Dynamic	2002	1900-2002		X
Sundelin, Karen Elise	2009	Aluminium Recycling of the Norwegian Building Stock System	MSc thesis	MSc thesis	EN	Lanau, M.	aluminum	mass			Building stock (Single house, chain, apartment bloc)	Single house + terraced house + apartment blocks + ecucation&research + Non-Residential Buildings	in-use	National			Norway, Sweden, Denmark			National		Static	2004 (norway), 2007 (denmark), 2009 (sweden)		X
Sundelin, Karen Elise	2008	Bottom-up Analysis of In-Use Stocks of Aluminium in Trondheim	Project report	Report	EN	Lanau, M.	Aluminum	mass	mass/cap		Buildings, Infrastructure, Transportation, Equipment, Packaging	Buildings + Infrastructures	in-use	Urban			Trondheim, Norway			Urban		Static	2008		X
Surahman, Usep; Higashi, Osamu; Kubota, Tetsu	2017	Evaluation of current material stock and future demolition waste for urban residential buildings in Jakarta and Bandung, Indonesia: embodied energy and CO2 emission analysis	Journal of Material Cycles and Waste Management	Journal	EN	Lanau, M.	Mortar; Soil; Stone; Concrete; Clay brick; Wood; Ceramic tile; Steel; Clay roof; Asbestos roof ; Paint; Zinc roof; Clear glass; Concrete roof; Gypsum; Concrete brick	mass	mass/house		urban residential building	Residential Buildings	in-use	Urban			Jakarta and Bandung, Indonesia			Urban		Static	2012		X
Taguchi, G., G; Hsu, F.; Tanikawa, H.; Matsuno, Y.	2012	Estimation of Steel Use in Buildings by Night Time Light Image and GIS	TETSU TO HAGANE-JOURNAL OF THE IRON AND STEEL INSTITUTE OF JAPAN	Journal	JPN	Lanau, M.	Steel	mass/m2			Building	Buildings	in-use	Urban			Tokyo,Japan	X		1 sq.km		Static	2008					X
Takahashi, Kazue Ichino; Terakado, Ryutaro; Nakamura, Jiro; Adachi, Yoshihiro; Elvidge, Christopher D. & Matsuno, Yasunari	2010	In-use stock analysis using satellite nighttime light observation data	Resources, Conservation & Recycling	Journal	EN	Lanau, M.	Copper	mass			anthropogenic stock	Built environment	In-use	National			India, Thailand, Malaysia, Viet Nam, Sri Lanka, Singapore		X	1 sq.km	30 arc-s	Dynamic	2006	1999-2006				X
Takahashi, Kazue Ichino; Terakado, Ryutaro; Nakamura, Jiro; Daigo, Ichiro; Matsuno, Yasunari & Adachi, Yoshihiro	2009	In-Use Stock of Copper Analysis Using Satellite Nighttime Light Observation Data	Materials Transactions	Journal	EN	Lanau, M.	Copper	mass			Anthropogenic	Built environment	In-use	National			8 Asian countries		X	National		Static	1996/97					X
Tanikawa, Hiroki & Hashimoto, Seiji	2009	Urban stock over time: spatial material stock analysis using 4d-GIS	Building Research & Information	Journal	EN	Lanau, M.	Aggregate, cement-concrete, mortar, ceramics, wood, glass, steel, aluminum, brick, asphalt, others	mass			Buildings, roadways, railways	Buildings + roadways + railways	in-use	Neighborhood			Salford Quays, Manchester, UK & Wakayama City Center, Japan	X		Object scale (mapped)		Dynamic	2004	1849-2004 & 1855-2004	X
Tanikawa, Hiroki; Fishman, Tomer; Okuoka, Keijiro & Sugimoto, Kenji	2015	The weight of society over time and space: A comprehensive account of the construction material stock of Japan, 1945-2010	Journal of Industrial Ecology	Journal	EN	Lanau, M.	Iron, Asphalt, Timber, Concrete-Cement, Aggregate, Other-material	mass			Buildings, Infrastructures (roads, railways, underground pipes…)	Buildings + roads + dams + railway + harbor + waterpipe + airport	In-use	National			Japan	X		1 sq.km		Dynamic	2010	1945-2010	X
Tanikawa, Hiroki; Hashimoto, Seiji & Moriguchi, Yuichi	2002	Estimation of Material Stock in Urban Civil Infrastructures and Buildings for the Prediction of Waste Generation	Proceedings of the Fifth International Conference on Ecobalance, 6-8 November 2002	Conference	EN	Lanau, M.	Sand & Gravel, Woods, Cement, Ceramics, Iron, Others	mass			Roadways, Buildings	Buildings + roads	in-use	Urban			Kitakyushu, Japan	X		Urban		Static	1995; 2020		X
Tukker, A.; Kleijn, R.; Voet, E. van der	1995	A chlorine balance for the Netherlands. Part II: Substance Documents	TNO-report - TNO Centre for Technology and Policy Studies, commissioned by the Ministries of Housing, Spatial Planning and the Environment (VROM), Economic Affairs and Transport, Public Works and Water Management	Report	EN	Kral, U.	Chloride in PVC	mass			Buildings (cable insulation, pipes, gutters and window frames), packaging, etc.	Anthropogenic		National			Netherlands			National		Static	1990						X
van Beers, D. & Graedel, Thomas E.	2003	The magnitude and spatial distribution of in-use copper in Cape Town	South African Journal of Science	Journal	EN	Lanau, M.	Copper	mass	mass/m2		Buildings, Electricity distribution, Telecommunication, Motor vehicles, Railway transport, Selected consumer products	Buildings + Electricity distribution + Telecommunication + Railway transport	in-use	Urban			Cape-Town, South Africa	X		Urban subareas		Dynamic	2000	1980-2050, 2000, 2010, 2020	X
van Beers, D. & Graedel, Thomas E.	2007	Spatial characterisation of multi-level in-use copper and zinc stocks in Australia	Journal of Cleaner Production	Journal	EN	Lanau, M.	Copper, Zinc	mass	mass/cap	mass/m2	Building and construction; Infrastructure; Transportation; Consumer durables; Business durables; Industrial durables	Buildings + Infrastructures	in-use	National	Regional	Urban	Inner Sydney, Sydney Metro, all Australian states/territories, and Australia	X		Urban subareas		Static	2000		X
van Beers, D.; Kapur, T.; Graedel, Thomas E.	2007	Copper and zinc recycling in Australia: potential quantities and policy options	Journal of Cleaner Production	Journal	EN	Lanau, M.	Copper, Zinc	mass			Building and construction, Infrastructure, Transportation, Consumer- business- industrial-durables	Single Family House + Multi Family House + commercial + industrial + power distribution + telecommunication + roads	in-use	National			Australia			Object scale (mapped)		Dynamic	2000	2000-2030	X
Vásquez, Felipe; Løvik, Amund N.; Sandberg, Nina Holck & Müller Daniel B.	2016	Dynamic type-cohort-time approach for the analysis of energy reductions strategies in the building stock	Energy and Buildings	Journal	EN	Lanau, M.	floor area, energy demand	area			Residential Buildings(Single Family Houses, Terraced houses, Multi-Family Houses, Apartment Blocks)	Residential Buildings	in-use	National			Germany, Czech Republic			National		Dynamic	2015	1800-2100		X
Venkatesh, G. & Brattebø, Helge	2012	Assessment of Environmental Impacts of an Aging and Stagnating Water Supply Pipeline Network: City of Oslo, 1991-2006	Journal of Industrial Ecology	Journal	EN	Lanau, M.	PE, PVC, Mild steel, Grey cast iron, Ductile iron	mass			Water pipeline network	Clean water network	in-use + hibernating	Urban			Oslo, Norway			Urban		Dynamic	2006	1991-2006	X
Venkatesh, G.; Hammervold, Johanne & Brattebø, Helge	2009	Combined MFA-LCA for analysis of wastewater pipeline networks: Case study of Oslo, Norway	Journal of Industrial Ecology	Journal	EN	Lanau, M.	Concrete, mild steel, PVC	mass			Wastewater pipeline network	Wastewater network	in-use	Urban			Oslo, Norway			Urban		Dynamic	2006	1991-2006; 2008-2027	X
Wallsten, Björn; Carlsson Annica; Frändegård Per; Krook Joakim & Svanström Stefan"	2013	To prospect an urban mine - Assessing the metal recovery potential of infrastructure cold spots in Norrköping Sweden	Journal of Cleaner Production	Journal	EN	Lanau, M.	copper, aluminum, iron (incl. steel)	mass			AC power (grid, private cables), DC power (grid, tramlines), telecommunication, town gas and district heating	electricity power cables + telecommunication + town gas + district heating	hibernating	Urban			Norrköping, Sweden	X		Urban subareas		Static	2012?		X
Wallsten, Björn; Magnusson Dick; Andersson Simon & Krook Joakim	2015	The economic conditions for urban infrastructure mining: Using GIS to prospect hibernating copper stocks	Resources, Conservation & Recycling	Journal	EN	Lanau, M.	Copper	mass			AC power grid	AC power grid	hibernating	Urban			Linköping, Sweden	X		Object scale (mapped)		Static	2014?		X
Wang, Jinlong; Graedel, Thomas E.	2010	Aluminum in-use stocks in China: a bottom-up study	Journal of Material Cycles and Waste Management	Journal	EN	Lanau, M.	Aluminum	mass	mass/cap		Motor vehicles, Bicycles, Air and aerospace, Marine and freshwater transport, Railroads and subways, Cargo containers, Residential buildings, NoNon-Residential buildings, Road signs, Street lights, Electrical wires and cables, Electrical transformation, Electrical generation, White goods, Electrical and electronic devices, Office machines, Other consumer durables, Manufacturing machinery, Constru…	Built environment	in-use	National			China			National		Static	2000, 2005		X
Wang, Lin; Qi, Zhong-ying; Pan, Feng	2014	Economic Output and Social Stock of Steel : Evidence from Dynamic Material Flow Analysis and Statistical Time Series Analysis	2014 International Conference on Management Science & Engineering	Conference	EN	Lanau, M.	Steel	mass	mass/cap		Anthropogenic stock	Anthropogenic	in-use	National			China			National		Dynamic	2012	1949-2012		X
Wang, Peng; Li, Wen; Kara, Sami	2015	Cradle-to-cradle modeling of the future steel flow in China	Resources, Conservation & Recycling	Journal	EN	Lanau, M.	Steel	mass/cap			Buildings and constructions, industrial equipment, Transportation, House Appliance, Others	Anthropogenic	in-use, obsolete	National			China			National		Dynamic	2010	2010-2100		X
Wang, T., Tian, X., Hashimoto, S., Tanikawa, H.,	2014	Concrete transformation of buildings in China and implications for the steel cycle	Resources, Conservation & Recycling	Journal	EN	Lanau, M.	Steel, floor area	floor area	floor area/cap	mass/cap	buildings	Residential Buildings + Non-Residential Buildings	in-use	National			China			National		Dynamic	2012	1950-2050		X
Wang, Tao; Müller Daniel B. & Hashimoto Seiji	2015	The ferrous find counting iron and steel stocks in China's economy	Journal of Industrial Ecology	Journal	EN	Lanau, M.	Iron, Steel	mass/cap			Buildings, Infrastructures, Domestic Appliances, Machinery, Transport Equipment	Buildings + Railways + roads + harbor + electricity powerstation + electricity transmission + oil and natural gas pipes + oil and gas wells + water supply + wastewater + heat pipes	in-use	National			China			Urban		Static	2000, 2010		X
Wang, Tao; Shi, Feng; Zhang, Qian; Qian, Xuepeng; Hashimoto, Seiji	2018	Exploring material stock efficiency of municipal water and sewage infrastructures in China	Journal of Cleaner Production	Journal	EN	Kral, U.	construction material	mass			water and sewage infrastructure	Water pipes + wastewater pipes	in-use	National			China			National		Static	1980, 2012, 2050		X
Wang, Tao; Zhou, Jun; Yue, Ye; Yang, Jie; Hashimoto, Seiji	2016	Weight under Steel Wheels: Material Stock and Flow Analysis of High-Speed Rail in China	Journal of Industrial Ecology	Journal	EN	Lanau, M.	Steel, Cement, Sand, Stones, Fly Ash, Lime, Copper, Aluminum	mass			High-Speed Rail	High-speed rail network	in-use	National			China			National		Static	2012, 2030		X
Wei Yang	2006	Modeling the evolution of chinese building stock in a sustainable perspective	PhD thesis	PhD thesis	CHN	Mao, R.	overall buidling area	m2	m2/cap		Building stock	Buildings	in-use	National			China			National		Dynamic	2010	2005-2050			X
Wen, Zongguo; Zhang, Chenkai; Ji, Xiaoli; Xue, Yanyan	2015	Urban Mining's Potential to Relieve China's Coming Resource Crisis	Journal of Industrial Ecology	Journal	EN	Lanau, M.	Copper, aluminum, lead, iron	mass			Electricity (Cu, Al), household appliances (Cu) transport (Cu, Al, Fe), electronics (Cu), construction (Cu, Al, Fe), Machinery (Al, Fe), Packagin (Al), Durable Consumers goods (Al, Fe), Battery (Pb), Pigment (Pb), Metal products (Pb), Chemicals (Pb), others (Cu, Al, Fe, Pb)	Anthropogenic	in-use	National			China			National		Dynamic	2010	2010-2050		X
Weng, C.-L. and T. Yashiro	2003	Urban Mining: The City as a Source for Re-usable Building Materials	International Conference on Open Building: Dense LivingUrban Structures. Hong Kong	Conference	EN	Kral, U.	Construction materials (Wood, Steel, Concrete, Aggregate)	mass	volume		Building stock	Buildings	in-use	National			Japan			National		Static	2002		X
Wiedenhofer, Dominik; Steinberger, Julia K.; Eisenmenger, Nina & Haas, Willi	2015	Maintenance and Expansion: Modeling Material Stocks and Flows for Residential Buildings and Transportation Networks in the EU25	Journal of Industrial Ecology	Journal	EN	Lanau, M.	nonmetallic minerals	mass			Residential Buildings, roads, railways	Residential Buildings + transport	in-use	Multinational			EU25			National		Dynamic	2004	2004-2009	X
Wittmer, Dominic; Lichtensteiger, Thomas	2007	Exploration of urban deposits: long-term prospects for resource and waste management	Waste Management & Research	Journal	EN	Lanau, M.	copper	mass/cap			buildings, infrastructre, movables, landfills	Buildings + Infrastructures	in-use	National			Switzerland			National		Dynamic	2000	1900-2000			X
Wüest & Partner	2008	Bauabfälle Hochbau in der Schweiz. Ergebnisse der Studie 2008.	Report	Report	DE	Kral, U.	concrete, bricks, burnable materials, wood, metals, mineral fractions, mixed materials	mass			buildings	Buildings		National			Switzerland			Regional	On the level of Cantons	Static	2008		X
Wüest & Partner	2015	Bauabfälle in der Schweiz - Hochbau	Report	Report	DE	Kral, U.	construction materials	mass			buildings	Buildings		National			Switzerland			Regional	On the level of Cantons	Static	2013		X
Xuan, Yanni; Yue, Qiang	2016	Forecast of steel demand and the availability of depreciated steel scrap in China	Resources, Conservation & Recycling	Journal	EN	Lanau, M.	Steel	mass/cap			Steel products	Anthropogenic	in-use	National			China			National		Dynamic	2010	2010-2030		X
Yang, Wei & Kohler, Niklaus	2008	Simulation of the evolution of the Chinese building and infrastructure stock	Building Research & Information	Journal	EN	Lanau, M.	floor area	area	floor area		building and infrastructure	Built environment	in-use	National			China			National		Dynamic	2005	1978-2005;2005-2050			X
Yin, Xiang; Chen, Wenying	2013	Trends and development of steel demand in China: A bottom-up analysis	Resources Policy	Journal	EN	Lanau, M.	Products containing steel	floor area			floor space, air conditioner, refrigerator, washing machine, microwave over, commercial floor space, private LDVs, buses, trucks	Anthropogenic	in-use	National			China			National		Dynamic	2010	2010-2050	X
Yu Lou	2007	Material metabolism for cities:methodology and case study of Handan city	MSc thesis	MSc thesis	CHN	Mao, R.	Steel, Aluminum	mass/cap			Anthropogenic stock	Anthropogenic	in-use	Urban			Handan, China			Urban		Dynamic	2005	1993-2005		X
Yue, Qiang; Wang, He Ming; Lu, Zhong Wu	2012	Quantitative estimation of social stock for metals Al and Cu in China	Transactions of Nonferrous Metals Society of China (English Edition)	Journal	EN	Lanau, M.	Aluminum, Copper	mass			anthropogenic stock	Anthropogenic	In-use	National			China			National		Dynamic	2009	2006-2009		X
Yue, Qiang; Wang, Heming; Gao, Chengkang; Du, Tao; Li, Mingjun; Lu, Zhongwu	2016	Analysis of iron in-use stocks in China	Resources Policy	Journal	EN	Lanau, M.	Iron	mass			anthropogenic stock	Anthropogenic	in-use	National			China			National		Dynamic	2013	1993-2013		X
Zeltner, C; Bader, H P; Scheidegger, R; Baccini, P	1999	Sustainable metal management exemplified by copper in the USA	Regional Environmental Change	Journal	EN	Lanau, M.	Copper	mass	mass/cap		Short term products, long-term products, landfill	Anthropogenic	in-use, landfill	National			US			National		Dynamic	1990	1900-2100		X
Zhang, Ling; Cai, Zhijian; Yang, Jiameng; Chen, Yan; Yuan, Zengwei	2014	Quantification and spatial characterization of in-use copper stocks in Shanghai	Resources, Conservation & Recycling	Journal	EN	Lanau, M.	Copper	mass	mass/cap	mass/m2	Infrastructure, Transportation, Buildings, Equiment	Buildings + Water supply and distribution + electricity power generation + electricity power transmission and distribution + telecommunication	in-use	Urban			Shanghai	X		Urban subareas		Static	2012		X
Zhang, Ling; Cai, Zhijian; Yang, Jiameng; Yuan, Zengwei; Chen, Yan	2015	The future of copper in China-A perspective based on analysis of copper flows and stocks	Science of the Total Environment	Journal	EN	Lanau, M.	Copper	mass			Infrastructure, Equipment, Transportation, Buildings	Buildings + Infrastructures	in-use	National			China			National		Dynamic	2010	1950-2010, 2013-2080		X
Zhang, Ling; Yang, Jiameng; Cai, Zhijian; Yuan, Zengwei	2015	Understanding the spatial and temporal patterns of copper in-use stocks in China	Environmental Science and Technology	Journal	EN	Lanau, M.	Copper	mass	mass/cap	mass/m2	Infrastructure (water supply and distribution, electric power generation, electric power transmission and distribution, telecommunications, broadcast and television network, rail lines and urban rail transit system, streetscape and traffic lights); transportation (motor vehicle, aircraft, civil transport vessels, railroad vehicles); buildings (Residential Buildings, Non-Residential Buildings); eq…	clean water pipe + electric power generation + electricity grid + telecommunications + broadcast and television network + railways+ Residential Buildings + Non-Residential Buildings	in-use	National			China	X (for static)		Regional		Dynamic	2012	1952-2012; Static: 2012	X	X
Zhang, Ling; Yuan, Zengwei & Bi, Jun	2012	Estimation of Copper In-use Stocks in Nanjing, China	Journal of Industrial Ecology	Journal	EN	Lanau, M.	Copper	mass	mass/cap		Infrastructure, Transportation, Buildings, Equipment	Electric power generation + Electric power transmission and distribution + Telecommunications + Broadcast and television network + Rail lines and metro system + Residential buildings + Commercial buildings + Industrial buildings	in-use	Urban			Nanjing, China			Urban		Static	2009		X
